# Supplementary material for: Molecular epidemiology and clinical features of hand, foot and mouth disease in northern Thailand in 2016: a prospective cohort study
Source: BMC Infect Dis. 2018 Dec 6;18:630. doi: 10.1186/s12879-018-3560-4 (PMC6282397; doi:10.1186/s12879-018-3560-4)
Supplement: Supplementary file 2 — HFMD_Data t is the coded data of the HFMD project which was conducted in northern Thailand. (XLSX 233 kb) [file 12879_2018_3560_MOESM2_ESM.xlsx]

## Sheet: AnalyzeHFM data panupong 
id	case	Inform	subdistrict	Distric	Province	Sex	age	agem	Weight	Height	Resid	Act	Placborn	Vacc	Mlik	Placare	MedCon	Disease	Drug	Famember	Famgt6YR	HisHFM	Mariatl	Religion	OccuF	IncomeF	OccuM	IncomeM	Carer	Edu	UtenilClen	Responsible	DateIll	Datecute	longtime	Hospital	Hand	dathandonsetofill	dayhnd	Knee	Datkneeonsetofill	daysKnee	Fever	datfever	dayfever	Oral	Dateoral	dayoral	Weak
1	1	3	1	1	1	1	1	3	9.1	71	1	2	1	1	4	1	2	1	1	6	1	1	2	1	1	25000	4	888	3	2	1	4	240758	240759	1	2	1	1	5	2	0	0	2	0	0	2	0	0	2
2	1	3	2	1	1	2	3	0	14	98	1	1	1	1	3	3	1	0	1	4	1	1	2	1	5	17000	4	888	3	2	1	4	240758	240759	1	2	1	1	4	1	1	4	1	1	4	1	3	3	2
3	1	3	2	1	1	2	2	5	11.3	83	1	1	1	1	1	2	1	0	1	4	1	1	2	1	4	18400	4	888	3	2	1	4	240759	240762	1	2	1	1	5	1	1	5	1	1	3	1	3	3	2
4	1	3	3	2	1	1	3	7	13	95	1	1	1	1	4	2	1	0	1	4	1	2	2	1	3	6000	4	888	2	3	1	2	240761	240762	1	2	1	1	7	1	1	7	2	0	0	2	0	0	2
5	1	2	3	2	1	1	3	2	14.5	98	1	1	1	1	4	2	1	0	1	4	1	1	2	1	1	8000	1	888	2	3	1	4	240761	240762	1	2	1	2	6	2	0	0	2	0	0	1	1	7	1
6	1	1	3	2	1	1	1	4	11.5	83	1	1	1	1	3	2	1	0	1	3	1	1	2	1	3	8000	1	888	1	2	1	4	29/2/2559	240758	5	2	1	1	7	1	1	7	1	1	1	1	1	2	2
7	1	1	4	1	1	2	1	6	10	80	2	1	1	1	3	2	1	0	1	4	1	1	2	1	4	6000	4	888	2	4	1	4	240762	240762	1	2	1	1	5	1	1	5	1	1	3	1	1	5	1
8	1	1	5	1	1	1	2	5	12	95	1	1	1	1	2	2	2	1	1	4	1	1	2	1	4	20000	4	888	3	4	1	1	240764	240764	1	2	1	1	5	1	1	5	1	1	1	1	1	5	1
9	1	3	6	1	1	1	2	7	13	93	2	1	1	1	1	1	1	0	1	4	2	1	2	1	5	10000	4	888	2	1	1	1	240762	240762	1	2	1	1	5	2	0	0	1	1	3	1	1	5	2
10	1	3	7	3	1	2	4	8	15.3	98	2	2	1	1	4	3	1	0	1	7	4	1	2	1	4	12000	4	888	3	1	1	1	240767	240769	1	2	1	1	4	2	0	0	2	0	0	1	1	4	1
11	1	2	8	3	1	1	1	4	8.5	76	2	2	1	1	4	1	1	0	1	4	1	1	2	1	2	60000	1	888	3	6	1	1	240773	240776	1	2	2	0	0	2	0	0	1	1	4	1	4	4	2
12	1	3	8	3	1	1	7	0	19	121	2	1	1	1	4	1	1	0	1	5	1	2	2	1	5	50000	4	888	2	6	1	1	240778	240778	1	2	1	4	5	1	3	5	1	2	7	1	4	5	2
13	1	3	17	8	3	2	3	9	3.3	94	2	1	1	1	4	2	1	0	1	4	1	1	2	1	3	5000	3	5000	2	4	2	4	240701	240732	1	2	1	1	6	2	0	0	2	0	0	2	0	0	2
14	1	3	17	8	3	1	1	2	8.2	72	1	2	1	1	4	1	1	0	1	6	1	1	2	1	1	0	1	0	3	1	2	4	30/4/2559	240701	5	2	1	1	7	1	1	7	2	0	0	1	1	6	2
15	1	2	17	8	3	1	1	6	11	90	1	1	1	1	4	1	1	0	1	4	2	1	2	1	4	10000	1	0	2	4	2	4	13/4/2559	14/4/2559	2	3	1	2	3	1	2	3	1	1	1	1	2	3	2
16	1	1	18	9	3	1	2	2	12	85	2	1	1	1	4	2	1	0	1	4	2	1	2	1	6	20000	1	0	3	4	2	4	240821	240882	1	2	1	2	6	2	0	0	1	2	2	1	3	3	1
17	1	1	19	9	3	1	2	8	12	90	1	1	1	1	4	2	1	0	1	5	1	1	2	1	4	10000	1	0	2	2	2	1	240821	240913	1	2	1	1	5	1	1	5	1	2	3	2	0	0	2
18	1	2	20	10	3	1	2	8	12	100	2	1	1	1	4	2	1	0	1	4	1	1	2	1	3	20000	1	0	2	4	2	4	16/5/2559	17/5/2559	2	2	1	1	6	2	0	0	1	1	1	2	0	0	2
19	1	1	20	10	3	2	2	6	10	90	2	1	1	1	3	2	1	0	1	3	1	1	2	1	3	5000	1	0	3	1	2	4	14/5/2559	15/5/2559	2	2	1	1	7	1	1	7	1	1	2	1	1	6	2
20	1	3	17	8	3	1	3	5	15	114	1	1	1	1	2	2	1	0	1	4	1	1	2	1	4	8000	1	0	3	2	2	4	16/5/2559	17/5/2559	2	2	1	1	6	2	0	0	2	0	0	1	1	2	2
21	1	2	20	10	3	1	1	7	12	73	1	1	1	1	3	1	1	0	1	3	1	1	2	1	4	15000	1	0	3	2	2	4	24/5/2559	25/5/2559	2	2	1	1	6	1	1	1	1	1	6	2	0	0	2
22	1	2	20	10	3	1	2	8	15	101	1	1	1	1	1	2	1	0	1	6	1	1	2	1	4	12000	1	0	2	4	2	4	21/5/2559	22/5/2559	2	2	1	1	6	1	1	6	1	1	2	1	1	6	1
23	1	2	20	10	3	1	2	6	12	82	1	1	1	1	2	2	1	0	1	4	1	1	2	1	4	10000	1	0	2	3	2	1	22/5/2559	22/5/2559	2	2	1	1	7	1	1	7	1	1	1	2	0	0	2
24	1	3	20	10	3	2	4	0	13	90	2	1	1	1	2	3	1	0	1	3	1	1	4	1	2	5000	1	0	3	1	2	4	18/8/2559	22/8/2559	5	2	1	1	7	1	1	7	1	1	2	1	0	2	2
25	1	3	21	9	3	2	3	3	18	105	2	1	1	2	3	2	1	0	1	3	1	1	2	1	4	20000	1	0	3	4	2	4	24/5/2559	28/5/2559	5	2	2	0	0	2	0	0	1	1	1	1	1	7	1
26	1	1	22	9	3	1	2	11	12.2	90	2	1	1	2	4	2	1	0	1	6	2	1	2	1	1	0	1	0	1	4	2	4	29/5/2559	30/5/2559	2	2	1	2	6	2	0	0	2	0	0	1	1	7	2
27	1	3	21	9	3	2	0	11	8.2	70	2	2	1	1	3	1	1	0	1	4	1	1	4	1	4	8000	1	0	3	2	2	4	26/5/2559	27/5/2559	2	2	2	0	0	2	0	0	1	1	5	1	2	6	2
28	1	2	21	9	3	2	3	6	18.2	103	2	1	1	1	3	2	1	0	1	3	1	1	2	1	3	8000	1	0	2	2	2	4	25/5/2559	29/5/2559	5	2	2	0	0	2	0	0	1	1	7	1	5	3	1
29	1	3	21	9	3	1	1	6	10	80	2	1	1	1	2	1	2	2	1	4	1	1	4	1	4	50000	1	0	3	2	2	4	30/5/2559	31/5/2559	2	2	2	0	0	2	0	0	1	1	2	1	1	5	1
30	1	1	23	11	3	2	1	2	9	68	1	1	1	1	4	1	1	0	1	10	2	1	2	1	3	10000	1	0	2	3	2	1	27/5/2559	29/5/2559	3	2	1	1	5	2	0	0	2	0	0	1	1	5	2
31	1	2	23	11	3	2	888	888	888	888	2	1	1	1	4	2	1	0	1	#NULL!	#NULL!	1	2	1	1	888	4	888	2	1	2	4	888.	888.	#NULL!	#NULL!	#NULL!	#NULL!	#NULL!	#NULL!	#NULL!	#NULL!	#NULL!	#NULL!	#NULL!	#NULL!	#NULL!	#NULL!	#NULL!
32	1	1	23	11	3	2	888	888	888	888	2	1	1	1	4	2	1	0	1	#NULL!	#NULL!	1	2	1	1	888	4	888	2	1	2	4	888.	888.	#NULL!	#NULL!	#NULL!	#NULL!	#NULL!	#NULL!	#NULL!	#NULL!	#NULL!	#NULL!	#NULL!	#NULL!	#NULL!	#NULL!	#NULL!
33	1	3	23	11	3	2	4	4	13	103	2	1	1	1	3	2	1	0	1	7	5	1	2	1	3	22000	1	0	3	2	2	4	30/4/2559	240852	6	3	1	1	7	2	0	0	1	1	1	2	0	0	2
34	1	2	23	11	3	1	3	0	15	90	2	1	1	1	4	2	1	0	1	4	2	2	2	2	2	17000	1	0	2	6	1	4	240733	240761	2	2	1	3	5	1	1	7	1	1	1	1	3	5	2
35	1	2	23	11	3	1	2	11	11	80	2	1	1	2	4	1	1	0	1	4	2	1	2	1	1	888	4	888	2	1	2	4	888.	888.	#NULL!	#NULL!	#NULL!	#NULL!	#NULL!	#NULL!	#NULL!	#NULL!	#NULL!	#NULL!	#NULL!	#NULL!	#NULL!	#NULL!	#NULL!
36	1	2	23	11	3	2	2	6	12	86	2	1	1	1	1	2	1	0	1	8	2	1	2	1	5	18000	1	0	2	5	2	1	888.	888.	#NULL!	#NULL!	#NULL!	#NULL!	#NULL!	#NULL!	#NULL!	#NULL!	#NULL!	#NULL!	#NULL!	#NULL!	#NULL!	#NULL!	#NULL!
37	1	2	20	10	3	1	1	0	8.4	60	2	2	1	1	4	2	1	0	1	4	2	2	2	1	4	12000	1	0	2	3	2	4	240792	240792	1	2	1	1	5	2	0	0	2	0	0	2	0	0	2
38	1	1	20	10	3	1	4	10	30	100	1	1	1	1	4	3	2	2	1	6	1	2	2	1	5	80000	1	0	3	2	2	4	240761	240792	1	2	1	2	6	1	3	5	1	1	2	1	1	7	2
39	1	3	20	10	3	1	4	0	25	95	1	1	1	1	4	3	1	0	1	3	1	2	2	1	5	10000	1	0	3	2	2	4	240822	240883	1	2	1	1	5	1	1	5	1	1	1	1	1	4	2
40	1	2	20	10	3	2	4	1	22	98	1	1	1	1	2	3	1	0	1	3	1	1	2	1	4	10000	1	0	3	2	2	4	240761	240792	1	2	1	1	7	2	0	0	1	1	1	1	1	3	2
41	1	2	20	10	3	2	3	4	12	90	2	1	#NULL!	1	1	2	1	0	1	5	2	1	2	1	6	9000	1	0	2	5	2	4	240761	240761	1	2	1	1	6	1	1	4	1	1	2	2	0	0	2
42	1	2	20	10	3	2	4	0	13	90	2	1	1	1	4	3	2	1	1	4	1	1	2	1	5	12000	1	0	2	4	2	2	30/6/2559	31/6/2559	2	2	1	1	7	2	0	0	1	1	1	2	0	0	2
43	1	3	20	10	3	2	3	0	13	88	2	1	1	1	2	2	1	0	1	5	2	1	2	1	3	30000	1	0	3	2	2	4	240822	240822	1	2	1	1	5	2	0	0	1	1	2	2	0	0	2
44	1	3	20	10	3	2	3	0	11	90	2	1	1	1	4	2	1	0	1	4	1	1	2	1	2	50000	1	0	3	2	2	4	240853	240853	1	2	1	1	6	2	0	0	1	1	1	2	0	0	2
45	1	3	20	10	3	2	3	2	20	95	1	1	1	1	2	2	1	0	1	3	1	2	2	1	4	5000	1	0	3	2	2	4	240822	240853	1	2	1	1	6	1	1	6	1	1	2	1	2	5	2
46	1	2	20	10	3	1	1	5	10.4	90	2	1	1	1	4	1	1	0	1	5	1	1	2	1	5	10000	1	0	2	1	2	4	240853	240853	1	2	1	1	6	2	0	0	1	1	2	1	1	5	2
47	1	3	24	11	3	1	1	6	11	76	2	2	1	2	1	1	1	0	1	12	2	1	1	1	5	5000	1	0	3	3	2	4	240822	240853	1	2	1	1	6	1	1	6	1	1	1	1	1	6	1
48	2	2	9	4	1	1	3	0	11	90	1	1	1	1	4	2	1	0	1	6	1	1	2	1	4	4000	4	888	2	4	2	4	31/5/2559	888.	#NULL!	1	1	7	2	2	0	0	2	0	0	2	0	0	2
49	1	2	9	4	1	1	0	11	8.4	74	1	2	1	1	3	1	1	0	1	5	1	1	2	1	4	15000	1	888	3	1	2	4	240761	240853	1	2	1	1	6	1	1	6	2	0	0	2	0	0	2
50	1	2	9	4	1	1	2	11	14	94	1	1	1	1	2	3	1	0	1	5	1	1	2	1	5	15000	4	888	3	4	2	4	240822	240914	1	2	1	3	3	2	0	0	1	1	2	1	1	5	2
51	1	2	10	5	1	1	1	7	12	80	1	1	1	1	3	1	1	0	1	5	1	2	2	1	4	20000	4	888	2	6	2	4	240883	240914	1	2	1	1	6	1	1	6	1	2	1	1	1	6	2
52	1	3	10	5	1	2	10	0	48	140	1	1	1	1	4	3	1	0	1	4	0	1	2	1	2	17000	1	888	2	6	2	4	240883	240914	1	2	1	1	5	2	0	0	1	1	1	1	1	5	2
53	1	3	11	4	1	2	2	2	10.7	83	1	1	1	1	4	2	1	0	1	8	2	1	2	1	4	30000	4	888	2	4	2	1	15/6/2559	17/6/2559	3	2	1	1	5	1	1	5	1	1	3	1	1	5	1
54	1	2	11	4	1	1	2	6	12	89	1	1	1	1	4	2	1	0	1	8	2	1	2	1	4	25000	4	888	2	4	2	4	17/6/2559	17/6/2559	1	2	2	0	0	2	0	0	1	1	5	1	3	3	1
55	1	3	12	4	1	2	2	6	14	94	2	1	1	1	2	2	1	0	1	3	1	1	2	1	4	9000	4	888	3	2	2	4	241036	24/6/2559	1	2	2	0	0	2	0	0	1	1	2	1	1	7	1
56	1	2	12	4	1	2	2	6	11	80	2	1	1	1	4	2	1	0	1	4	1	1	2	1	4	10000	4	888	2	1	2	4	19/6/2559	20/6/2559	2	2	1	2	6	2	0	0	1	1	3	1	1	6	1
57	1	1	12	4	1	2	1	7	9	90	2	2	1	2	4	1	1	0	1	4	1	1	2	1	4	9000	4	888	2	1	2	4	19/6/2559	21/6/2559	3	2	1	1	7	2	0	0	2	0	0	1	1	7	2
58	1	2	13	6	1	2	2	11	11.5	93	2	1	1	1	4	2	1	0	1	4	1	1	2	1	5	15000	4	888	2	2	2	4	22/6/2559	23/6/2559	2	2	1	1	6	1	1	6	1	1	2	1	1	6	2
59	2	2	13	6	1	2	2	8	10.1	83	2	1	1	1	4	2	1	0	1	5	1	2	2	1	1	9000	4	888	2	3	2	4	17/6/2559	888.	#NULL!	1	1	1	5	2	0	0	2	0	0	1	1	5	2
60	2	2	13	6	1	1	2	11	12	91	2	1	1	1	4	2	1	0	1	3	1	1	2	1	3	12000	1	888	2	4	2	1	18/6/2559	888.	#NULL!	1	2	0	0	2	0	0	1	1	4	2	0	0	2
61	1	2	13	6	1	1	4	0	18	105	2	1	1	1	4	2	1	0	1	7	1	2	2	1	3	14000	4	888	3	1	2	1	18/6/2559	19/6/2559	2	2	1	1	7	2	0	0	1	1	3	1	1	6	1
62	1	2	13	6	1	1	2	10	10.7	85	2	1	1	1	4	2	1	0	1	5	1	1	2	1	4	20000	4	888	2	4	2	4	22/6/2559	22/6/2559	1	2	1	1	5	2	0	0	2	0	0	2	0	0	2
63	1	888	25	9	3	1	2	8	14	87	2	1	1	1	4	1	1	0	1	4	3	1	2	1	4	50000	1	0	2	4	2	1	22/5/2559	22/5/2559	1	2	1	1	6	2	0	0	1	1	3	2	0	0	2
64	2	888	25	9	3	1	2	0	11	90	2	1	1	2	4	2	1	0	1	3	1	1	2	1	3	5000	3	888	2	1	2	4	27/6/2559	27/6/2559	1	1	1	1	6	1	1	6	2	0	0	2	0	0	2
65	2	888	25	9	3	2	3	2	14	93	2	1	1	1	4	1	1	0	1	4	3	1	2	1	3	10000	3	888	2	1	2	2	23/6/2559	24/6/2559	2	1	1	1	5	2	0	0	2	0	0	2	0	0	2
66	2	888	25	9	3	2	2	8	10.9	86	2	1	1	1	4	1	1	0	1	3	2	1	2	1	4	20000	1	888	2	1	2	4	27/6/2559	888.	#NULL!	1	1	1	6	1	1	6	1	1	2	1	1	6	2
67	1	888	25	9	3	2	3	0	11.2	90	2	1	1	3	2	2	1	0	1	8	3	1	2	1	4	30000	1	888	3	1	2	4	240870	240870	1	2	1	1	6	2	0	0	2	0	0	1	1	2	1
68	1	888	25	9	3	1	4	4	13	97	2	1	1	1	4	2	1	0	1	4	1	1	2	1	4	5000	4	888	2	3	2	4	240870	240870	1	2	1	1	5	2	0	0	2	0	0	1	1	5	2
69	1	888	25	9	3	2	4	104	2	16.2	1	1	1	1	4	1	1	0	1	4	2	1	2	1	4	50000	1	888	2	4	2	1	240866	240870	1	2	2	0	0	2	0	0	1	2	2	1	1	4	2
70	1	888	13	6	1	1	1	0	9.3	80	2	2	1	1	4	1	1	0	1	3	1	2	1	1	3	9000	4	888	2	1	2	4	240869	240870	1	2	2	0	0	2	0	0	2	0	0	1	1	2	1
71	1	2	13	6	1	1	2	10	13	95	2	1	1	1	4	2	1	0	1	4	2	1	2	1	1	888	6	9000	2	3	2	4	240874	240874	1	2	1	1	6	2	0	0	1	1	2	1	1	5	2
72	1	2	13	6	1	2	4	9	13.8	98	2	1	1	1	4	3	1	0	1	6	2	1	2	1	1	888	6	8000	2	4	2	4	240873	240873	1	2	1	2	6	2	0	0	2	0	0	2	0	0	1
73	1	2	13	6	1	2	4	9	14.1	98	2	1	1	3	4	2	1	0	1	#NULL!	#NULL!	1	2	1	1	888	1	888	2	1	2	4	888.	888.	#NULL!	#NULL!	#NULL!	#NULL!	#NULL!	#NULL!	#NULL!	#NULL!	#NULL!	#NULL!	#NULL!	#NULL!	#NULL!	#NULL!	#NULL!
74	1	888	14	6	1	2	2	2	12.4	86	2	1	1	3	4	2	1	0	1	7	2	1	2	1	4	8000	6	8000	2	6	2	1	240875	240875	1	2	1	1	5	2	0	0	2	0	0	2	0	0	2
75	1	888	15	4	1	2	1	7	10	88	1	1	1	1	4	2	1	0	1	3	1	1	2	1	3	50000	3	888	3	2	2	4	240871	240874	1	2	2	0	0	2	0	0	1	1	6	1	4	3	2
76	1	1	13	6	1	2	2	0	13	85	2	1	1	1	4	2	1	0	1	3	1	1	2	1	4	7000	4	7000	2	4	2	4	240873	240875	1	2	1	1	7	2	0	0	2	0	0	1	1	7	2
77	1	2	16	7	1	2	2	6	15	90	1	1	1	1	4	1	1	0	1	6	1	1	2	1	2	12000	2	12000	3	2	2	4	240876	240876	1	2	2	0	0	2	0	0	2	0	0	1	1	6	2
78	1	2	16	7	1	2	3	7	15	87	1	1	1	1	4	1	1	0	1	6	1	1	2	1	4	12000	4	888	2	4	2	4	240876	240876	1	2	1	1	6	1	1	2	2	0	0	1	1	6	2
79	1	2	16	7	1	1	2	4	11	87	1	1	1	1	4	1	1	0	1	3	1	1	2	1	4	15000	4	888	2	4	2	4	240875	240875	1	2	1	1	5	2	0	0	1	1	2	1	1	5	2
80	1	2	16	7	1	2	2	10	15	98	1	1	1	1	4	1	1	0	1	5	1	1	2	1	3	10000	3	888	3	2	2	4	240874	240874	1	2	1	3	2	2	0	0	1	1	1	1	1	4	2
81	1	2	16	7	1	2	4	0	15	97	1	1	1	1	3	1	1	0	1	3	1	1	2	1	4	6000	4	6000	3	1	2	4	28/6/2559	29/6/2559	2	2	1	1	7	2	0	0	2	0	0	1	1	7	2
82	1	2	26	12	1	1	3	6	14	95	2	2	1	1	2	2	1	0	1	5	1	1	2	1	4	12000	6	5000	2	3	2	4	240793	240823	1	2	1	1	4	1	1	2	1	1	1	1	1	5	2
83	1	2	27	13	1	2	2	5	14	92	2	1	1	1	4	3	1	0	1	5	1	1	2	1	3	6000	3	6000	2	1	2	4	28/6/2559	240703	5	2	1	3	4	2	0	0	1	1	1	1	3	4	2
84	1	2	28	13	1	1	4	1	16	101	2	1	1	1	4	2	1	0	1	4	1	2	2	1	3	7500	3	7500	2	1	2	4	240703	240703	1	2	1	1	3	2	0	0	2	0	0	2	0	0	2
85	1	2	27	13	1	1	2	10	12	87	1	1	1	1	2	2	1	0	1	#NULL!	#NULL!	1	2	1	4	888	4	888	3	1	2	4	240762	240793	1	2	1	1	#NULL!	2	#NULL!	#NULL!	1	1	#NULL!	1	1	#NULL!	2
86	1	2	28	13	1	2	2	2	11.5	86	2	1	1	1	4	2	1	0	1	4	1	1	2	1	4	10000	4	10000	2	4	2	4	240793	240823	1	2	1	1	7	2	0	0	2	0	0	1	1	7	2
87	1	2	27	13	1	2	3	9	888	888	1	1	1	1	4	2	1	0	1	4	1	1	2	1	4	888	4	888	3	1	2	4	240793	240823	1	2	1	1	#NULL!	2	#NULL!	#NULL!	2	#NULL!	#NULL!	1	1	#NULL!	2
88	1	2	20	10	3	1	2	0	9.5	92	2	1	1	1	4	1	1	0	1	4	1	1	2	1	5	6000	5	6000	2	2	2	4	240734	240734	1	2	1	1	6	1	2	5	1	1	2	1	1	6	2
89	1	1	20	10	3	2	3	0	15	110	2	1	1	1	3	2	1	0	1	6	1	1	2	1	2	12500	2	12500	4	6	2	4	30/6/2559	30/6/2559	1	2	1	1	7	2	0	0	1	1	2	1	1	3	2
90	1	2	20	10	3	2	2	2	13	78	2	1	1	1	4	2	1	0	1	4	1	1	2	1	4	6000	4	6000	3	1	2	4	27/6/2559	28/6/2559	3	2	1	2	6	2	0	0	1	1	2	1	2	5	2
91	1	1	20	10	3	1	3	9	15	101	2	1	1	1	4	2	1	0	1	5	1	1	2	1	3	7000	3	8000	3	4	2	4	27/6/2559	28/6/2559	2	2	1	2	4	2	0	0	1	1	4	2	0	0	2
92	1	3	20	10	3	1	2	3	12	87	2	1	1	1	4	2	1	0	1	4	1	1	2	1	4	8000	4	8000	3	4	2	4	25/6/2559	28/6/2559	4	2	1	2	6	2	0	0	1	1	3	1	2	6	2
93	1	2	20	10	3	2	2	7	13	91	2	1	1	1	4	1	1	0	1	4	1	1	2	1	4	15000	4	7000	2	4	2	4	25/6/2559	27/6/2559	3	2	1	1	7	1	1	7	1	1	3	1	1	6	2
94	1	2	29	10	3	2	2	2	12	65	1	1	1	1	2	2	1	0	1	6	2	1	2	1	2	12000	2	12000	2	6	2	4	25/6/2559	26/6/2559	2	2	1	1	7	2	0	0	1	1	4	1	1	4	2
95	1	2	20	10	3	1	2	10	14.5	98	2	1	1	1	4	2	1	0	1	4	1	1	2	1	4	7500	4	7500	3	2	2	4	240884	240976	1	2	1	3	4	1	3	4	1	1	1	1	3	4	2
96	1	2	29	10	3	2	2	3	11	80	1	1	1	1	4	2	1	0	1	3	1	1	2	1	3	10000	3	10000	2	4	2	4	240915	240915	1	2	1	1	7	1	2	6	1	1	1	1	1	4	2
97	1	2	20	10	3	1	4	1	13	95	2	1	1	1	4	2	1	0	1	3	1	1	2	1	3	15000	3	15000	2	2	2	4	240855	240916	1	2	1	1	7	1	1	7	1	1	2	1	1	5	2
98	1	2	30	10	3	2	0	10	8	71	1	2	1	1	3	1	1	0	1	4	1	1	2	1	4	5000	4	5000	2	3	2	4	240915	240946	1	2	1	1	6	1	1	6	1	1	1	1	1	2	2
99	1	2	30	10	3	1	2	10	13.5	94	2	1	1	1	4	2	1	0	1	5	1	1	2	1	4	15000	1	0	2	4	2	1	240915	241007	1	2	1	1	3	2	0	0	2	0	0	1	1	2	2
100	1	3	17	9	3	2	2	4	13	87	2	2	1	1	4	2	1	0	1	10	2	1	2	1	4	5000	4	5000	4	5	2	4	240884	240884	1	2	1	1	5	2	0	0	1	1	2	1	1	5	2
101	1	2	21	9	3	2	3	11	13	98	2	1	1	1	4	1	1	0	1	4	1	1	2	1	4	9000	6	9000	2	4	2	4	240793	240854	1	2	1	1	7	1	1	7	1	1	2	1	1	5	2
102	2	2	17	9	3	1	3	11	13	95	1	1	1	1	3	1	1	0	1	4	2	1	2	1	4	5000	6	5000	3	1	2	4	241007	241007	1	1	1	1	5	1	1	7	2	0	0	1	1	7	2
103	1	2	17	9	3	1	5	7	18	110	2	1	1	1	1	3	1	0	1	6	1	1	2	1	3	25000	3	25000	3	1	2	4	241037	241037	1	2	1	1	4	2	0	0	2	0	0	1	1	6	2
104	1	2	31	12	1	2	2	9	14.5	97	2	1	1	2	2	2	1	0	1	4	1	1	4	1	1	888	4	9000	3	2	2	2	241007	241037	1	2	1	2	6	2	0	0	1	1	1	1	1	6	2
105	1	888	31	888	1	2	2	0	10	888	2	1	1	1	4	2	1	0	1	#NULL!	#NULL!	1	2	1	1	888	1	888	2	1	2	4	888	888	#NULL!	#NULL!	#NULL!	#NULL!	#NULL!	#NULL!	#NULL!	#NULL!	#NULL!	#NULL!	#NULL!	#NULL!	#NULL!	#NULL!	#NULL!
106	1	888	32	12	1	2	1	0	888	888	2	1	1	1	4	2	1	0	1	#NULL!	#NULL!	1	2	1	1	888	1	888	2	1	2	4	888	888	#NULL!	#NULL!	#NULL!	#NULL!	#NULL!	#NULL!	#NULL!	#NULL!	#NULL!	#NULL!	#NULL!	#NULL!	#NULL!	#NULL!	#NULL!
107	1	1	26	12	1	1	4	1	17	110	2	1	1	1	4	2	1	0	1	8	6	1	1	1	4	9000	1	0	1	2	2	1	240976	241007	1	2	1	1	5	1	1	5	1	5	1	1	5	1	1
108	1	2	33	13	1	1	4	6	16	111	2	1	1	1	4	2	1	0	1	#NULL!	#NULL!	1	2	1	1	888	1	888	2	1	2	4	241007	23/1/2559	2	#NULL!	#NULL!	#NULL!	#NULL!	#NULL!	#NULL!	#NULL!	#NULL!	#NULL!	#NULL!	#NULL!	#NULL!	#NULL!	#NULL!
109	1	1	34	13	1	1	2	8	888	888	2	1	1	1	3	2	1	0	1	3	1	1	2	1	1	888	1	888	3	1	2	4	240884	240915	2	2	1	2	#NULL!	2	#NULL!	#NULL!	2	#NULL!	#NULL!	1	1	#NULL!	2
110	1	2	34	13	1	1	3	16	85	1	1	1	1	1	4	2	1	0	1	3	1	1	2	1	3	10000	3	10000	2	2	2	4	241007	241037	1	2	1	1	6	2	0	0	2	0	0	1	1	6	2
111	1	1	35	5	1	1	2	0	10	83	2	1	1	1	4	3	1	0	1	3	1	1	2	2	4	10000	4	10000	2	2	2	4	240703	240734	1	2	1	2	6	2	0	0	2	0	0	1	2	4	2
112	1	888	36	888	888	1	888	888	888	888	2	1	1	1	4	2	1	0	1	#NULL!	#NULL!	1	2	1	1	888	1	888	2	1	2	4	888	888	#NULL!	#NULL!	#NULL!	#NULL!	#NULL!	#NULL!	#NULL!	#NULL!	#NULL!	#NULL!	#NULL!	#NULL!	#NULL!	#NULL!	#NULL!
113	1	2	36	11	3	1	1	7	8	73	2	2	1	1	3	1	1	0	1	#NULL!	#NULL!	1	2	1	1	888	1	888	2	1	2	4	888	888	#NULL!	#NULL!	#NULL!	#NULL!	#NULL!	#NULL!	#NULL!	#NULL!	#NULL!	#NULL!	#NULL!	#NULL!	#NULL!	#NULL!	#NULL!
114	1	2	36	11	3	1	1	7	8	73	2	2	1	1	3	1	1	0	1	#NULL!	#NULL!	1	2	1	1	888	1	888	2	1	2	4	888	888	#NULL!	#NULL!	#NULL!	#NULL!	#NULL!	#NULL!	#NULL!	#NULL!	#NULL!	#NULL!	#NULL!	#NULL!	#NULL!	#NULL!	#NULL!
115	1	3	13	6	1	2	5	8	35	122	2	1	1	1	4	3	1	0	1	5	2	1	1	1	4	9000	4	9000	2	4	2	4	240823	241037	1	2	1	1	6	2	0	0	2	0	0	2	0	0	2
116	1	2	37	6	1	1	5	10	20	110	2	1	1	1	4	3	1	0	1	5	2	1	2	1	5	60000	2	25000	3	6	2	4	19/7/2559	21/7/2559	3	2	1	1	7	1	1	7	1	1	1	1	1	3	2
117	1	2	37	6	1	1	2	6	15	90	2	1	1	1	4	2	1	0	1	5	2	1	2	1	5	60000	2	25000	3	6	2	4	16/7/2559	21/7/2559	6	2	1	1	7	1	1	7	1	1	1	1	1	3	2
118	1	2	29	10	3	2	1	2	8.8	72	1	2	1	1	4	1	1	0	1	3	1	1	2	1	4	5000	1	0	4	4	2	4	241037	23/7/2559	2	2	2	0	0	1	1	7	1	1	4	1	3	3	2
119	1	3	30	10	3	2	2	4	18.5	85	2	1	1	1	2	2	1	0	1	3	1	1	4	1	4	8000	4	8000	3	4	2	4	18/7/2559	19/7/2559	2	2	1	1	6	2	0	0	1	1	2	1	1	5	2
120	1	2	20	10	3	2	1	1	8	90	1	2	1	1	2	1	1	0	1	5	1	1	2	1	5	20000	5	20000	4	4	2	4	20/7/2559	21/7/2559	2	2	1	1	7	1	1	7	1	1	3	2	0	0	2
121	1	3	30	10	3	2	2	0	11	78	1	1	1	1	3	2	1	0	1	3	1	1	3	1	1	0	2	20000	3	2	2	4	22/7/2559	22/7/2559	1	2	1	1	7	2	0	0	2	0	0	1	1	2	2
122	1	2	30	10	3	2	1	4	9	80	2	2	1	1	2	1	1	0	1	3	1	1	2	1	4	7000	4	7000	3	2	2	4	22/7/2559	22/7/2559	1	2	1	1	6	1	1	6	1	1	3	1	1	4	2
123	1	2	30	10	3	1	2	11	19	89	2	1	1	1	2	2	1	0	1	4	1	1	2	1	4	3000	4	3000	2	3	2	4	25/7/2559	25/7/2559	1	2	1	1	7	1	1	7	1	1	1	1	1	2	2
124	1	2	30	10	3	2	1	4	10	73	2	2	1	1	4	1	1	0	1	3	1	1	2	1	4	5000	6	4000	2	4	2	1	24/7/2559	25/7/2559	2	2	1	1	7	2	0	0	1	1	1	1	1	3	2
125	1	2	30	10	3	1	2	7	22	95	2	1	1	1	2	2	1	0	1	5	1	1	2	1	4	15000	4	15000	3	2	2	4	24/7/2559	25/7/2559	2	2	1	1	6	1	1	6	1	1	2	1	2	2	2
126	1	2	23	11	3	1	1	9	12	84	2	2	1	1	4	1	1	0	1	#NULL!	#NULL!	1	2	1	1	888	1	888	2	1	2	4	888	888	#NULL!	#NULL!	#NULL!	#NULL!	#NULL!	#NULL!	#NULL!	#NULL!	#NULL!	#NULL!	#NULL!	#NULL!	#NULL!	#NULL!	#NULL!
127	1	3	38	14	3	2	2	7	13.6	74	1	1	1	1	4	2	1	0	1	4	1	1	2	1	6	12000	6	6000	2	5	2	4	15/7/2559	21/7/2559	6	2	1	2	6	2	0	0	1	1	3	1	2	5	2
128	1	2	39	14	3	1	1	9	14.5	88	1	2	1	1	4	1	1	0	1	2	1	1	2	1	4	12000	1	0	2	3	2	2	241037	15/7/2559	6	2	1	1	7	2	0	0	1	1	4	1	1	3	1
129	1	2	40	12	1	1	2	2	14	95	2	1	1	1	3	2	1	0	1	6	1	1	2	1	4	10000	4	9000	3	3	2	4	19/7/2559	21/7/2559	3	2	1	2	7	1	2	7	2	0	0	1	2	3	2
130	1	2	41	12	1	2	2	5	10	91	2	1	1	1	4	2	1	0	1	4	1	1	2	1	4	10000	6	10000	2	5	2	4	26/7/2559	29/7/2559	4	2	2	0	0	2	0	0	2	0	0	1	1	7	2
131	1	2	29	10	3	1	1	11	11	70	2	1	1	1	4	2	1	0	1	5	1	1	2	1	3	8000	3	8000	4	4	2	4	28/7/2559	28/7/2559	1	2	#NULL!	#NULL!	#NULL!	#NULL!	#NULL!	#NULL!	#NULL!	#NULL!	#NULL!	#NULL!	#NULL!	#NULL!	#NULL!
132	1	3	29	10	3	2	2	11	14	88	1	1	1	1	3	2	1	0	1	3	1	1	2	1	4	8000	4	8000	3	2	2	4	26/7/2559	28/7/2559	3	2	1	1	7	2	0	0	2	0	0	1	1	4	2
133	1	2	29	10	3	2	1	4	9	66	1	2	1	1	2	1	1	0	1	5	1	2	2	1	4	3000	4	4000	3	2	2	2	30/7/2559	31/7/2559	2	2	2	0	0	2	0	0	1	1	3	1	4	4	2
134	1	2	30	10	3	1	2	3	11	83	2	1	1	1	4	2	1	0	1	3	1	1	2	1	3	10000	1	0	4	2	2	4	31/7/2559	310735	1	2	1	1	6	2	0	0	1	2	2	1	1	4	1
135	1	2	42	15	1	1	0	9	10	65	2	2	1	1	4	1	1	0	1	7	1	1	2	1	3	10000	3	10000	4	6	2	1	30/7/2559	300704	1	2	1	1	7	2	0	0	1	1	1	1	1	4	2
136	1	1	42	15	1	2	1	9	10	77	2	2	1	1	4	1	1	0	1	13	2	1	2	1	3	3000	3	3000	4	2	2	4	30/7/2559	30/7/2559	1	2	2	0	0	1	1	7	1	1	4	1	1	3	2
137	1	3	43	11	3	1	2	10	11	92	1	1	1	1	4	2	1	0	1	3	1	1	2	1	4	10000	1	0	2	4	2	1	240704	240704	1	2	1	1	4	2	0	0	1	1	1	1	1	4	2
138	1	3	30	10	3	2	1	9	9	78	2	2	1	1	4	1	1	0	1	3	1	1	4	1	3	10000	3	10000	4	4	2	4	240824	240855	1	2	1	2	6	1	2	6	1	1	1	1	2	2	2
139	1	3	29	10	3	2	3	7	15.5	95	1	2	1	1	2	1	1	0	1	3	1	1	2	1	2	16000	4	18000	3	1	2	4	240855	240885	1	2	1	2	6	2	0	0	1	1	1	1	2	4	2
140	1	1	44	16	1	1	4	6	30	110	1	1	1	1	4	3	2	1	1	6	1	1	2	1	3	30000	3	30000	4	3	2	4	240704	240763	1	2	1	1	7	2	0	0	1	1	1	1	1	4	2
141	1	3	44	16	1	2	5	10	15	104	2	1	1	1	2	3	1	0	1	4	1	1	2	1	3	40000	3	40000	3	2	2	3	240704	240763	1	2	1	1	7	1	1	7	2	0	0	1	1	4	2
142	1	2	44	16	1	1	3	5	15	98	1	1	1	1	4	3	1	0	1	3	1	1	2	1	3	20000	3	20000	3	1	2	3	240704	240763	1	2	1	1	7	1	1	7	1	1	2	1	1	4	2
143	1	3	44	16	1	1	1	1	8	61	2	2	1	2	4	1	1	0	1	8	2	1	4	2	3	100000	3	100000	2	1	2	2	29/7/2559	290704	1	2	1	3	4	1	3	2	1	1	1	1	3	5	2
144	1	1	44	16	1	1	0	10	8.3	73	2	2	1	1	4	1	1	0	1	3	1	1	2	1	3	100000	3	100000	4	1	2	4	240735	240794	1	2	1	1	7	1	1	7	2	0	0	1	1	4	2
145	1	2	44	16	1	2	4	5	20	106	2	1	1	2	4	3	1	0	1	4	1	1	2	1	4	4000	1	0	4	2	2	4	30/7/2559	300704	1	2	1	3	5	2	0	0	1	3	2	1	1	5	1
146	1	1	44	16	1	2	1	4	9.3	70	2	2	1	1	1	1	1	0	1	9	3	1	2	1	3	20000	3	20000	4	5	2	4	240855	240885	1	3	1	1	6	1	1	6	1	1	3	1	1	5	2
147	1	2	44	16	1	2	2	6	10	90	2	1	1	1	3	2	1	0	1	5	1	1	2	1	3	25000	3	25000	2	2	2	4	240855	240885	1	3	1	1	7	1	1	7	1	1	3	1	1	3	2
148	1	2	45	15	1	1	1	7	10.5	80	1	1	1	1	4	2	1	0	1	7	2	1	2	1	5	50000	5	50000	2	4	2	2	240885	240946	1	2	1	1	6	2	0	0	1	1	2	1	2	4	2
149	1	2	2	1	1	2	3	10	13.7	75	2	1	1	1	4	2	1	0	1	4	1	1	2	1	4	10000	1	0	2	1	2	2	240794	240824	1	2	1	1	4	2	0	0	1	1	4	1	2	4	1
150	1	2	5	1	1	2	2	7	13	88	1	1	1	1	4	2	1	0	1	8	3	1	2	1	1	0	4	4000	2	1	2	2	240824	240916	1	2	1	1	7	1	1	7	2	0	0	2	0	0	2
151	1	2	13	6	1	1	8	4	27	135	1	1	1	1	4	3	1	0	1	4	1	1	2	1	2	25000	2	25000	4	6	2	4	240824	240824	1	2	2	0	0	2	0	0	1	1	3	1	1	4	1
152	1	2	46	5	1	1	4	5	15	108	1	1	1	1	1	2	2	2	1	3	1	1	4	1	1	0	4	8000	3	1	2	2	14/8/2559	15/8/2559	3	2	2	0	0	2	0	0	1	1	2	1	1	4	2
153	1	3	46	5	1	1	3	7	15	95	1	1	1	1	4	2	1	0	1	3	1	1	4	1	1	0	4	10000	2	2	2	2	13/8/2559	15/8/2559	3	2	1	1	6	2	0	0	1	1	2	1	1	6	2
154	1	1	42	15	1	1	1	2	8	70	2	2	1	2	3	1	1	0	1	5	2	1	2	1	3	5000	3	5000	2	3	2	2	240977	241038	1	2	1	1	5	1	1	5	1	1	6	1	1	3	2
155	1	2	5	1	1	1	1	8	16.5	85	2	2	1	1	2	2	1	0	1	3	1	1	2	1	4	16000	4	9000	1	3	2	1	14/8/2559	15/8/2559	2	2	1	1	6	2	0	0	2	0	0	1	1	6	1
156	1	2	30	10	3	1	2	0	11	82	2	1	1	1	4	2	1	0	1	3	1	1	2	1	3	5000	3	2000	4	3	2	4	16/8/2559	16/8/2559	1	2	1	1	4	2	0	0	1	1	2	1	1	2	2
157	1	2	30	10	3	1	1	1	10	72	2	1	1	1	4	1	1	0	1	4	1	1	2	1	3	5000	3	5000	2	1	2	4	14/8/2559	15/8/2559	2	2	1	1	3	2	0	0	1	1	2	1	1	2	2
158	1	2	30	10	3	1	1	5	9	56	2	2	1	1	4	1	1	0	1	5	3	1	2	1	3	8000	3	8000	2	3	2	1	241038	241038	1	2	1	1	4	1	1	3	1	1	3	1	1	3	1
159	1	1	30	10	3	1	1	4	11	58	2	1	1	1	4	1	1	0	1	4	1	1	2	1	3	9000	3	9000	3	1	2	1	241038	241038	1	2	#NULL!	#NULL!	#NULL!	#NULL!	#NULL!	#NULL!	#NULL!	#NULL!	#NULL!	#NULL!	#NULL!	#NULL!	#NULL!
160	1	3	9	4	1	2	2	8	11	84.8	1	1	1	1	4	2	1	0	1	5	1	1	2	1	4	10000	4	10000	2	4	2	4	240947	240977	1	2	1	1	3	2	0	0	2	0	0	1	1	3	2
161	1	2	47	6	1	1	2	0	13.5	73	1	2	1	1	1	1	1	0	1	4	1	1	2	1	4	10000	4	10000	4	2	2	4	19/8/2559	23/8/2559	5	2	1	1	7	2	0	0	1	1	1	1	1	5	2
162	1	1	42	15	1	1	1	6	11	53	2	2	1	1	3	1	1	0	1	8	1	1	2	2	5	5000	5	5000	4	5	2	4	22/8/2559	23/8/2559	2	2	1	1	7	1	1	7	1	1	1	1	1	3	2
163	1	3	48	8	3	1	1	6	9.8	79	2	1	1	1	4	1	2	2	2	5	1	1	2	1	4	6500	1	0	3	1	2	1	21/8/2559	22/8/2559	2	2	1	2	4	2	0	0	1	2	1	1	1	3	1
164	1	3	49	12	1	1	0	11	10	90	1	2	1	1	3	1	1	0	1	6	1	1	2	1	5	7500	5	7500	2	1	2	4	22/8/2559	24/8/2559	3	2	1	2	5	2	0	0	1	1	3	1	2	6	2
165	1	3	30	10	3	1	0	9	9	62	2	1	1	1	4	1	1	0	1	6	1	1	2	1	4	9000	1	0	2	3	2	1	18/8/2559	19/8/2559	2	2	1	1	7	2	0	0	1	1	3	1	1	4	2
166	1	3	5	1	1	1	3	0	15	94	1	2	1	1	4	2	1	0	1	4	1	1	2	1	6	6000	4	8000	2	1	2	1	21/8/2559	22/8/2559	3	2	2	0	0	2	0	0	1	1	3	1	1	6	2
167	1	1	13	6	1	1	0	7	7.5	65	2	2	1	1	3	1	1	0	1	3	1	1	2	1	3	10000	3	10000	2	1	2	1	23/8/2559	24/8/2559	2	2	1	1	6	2	0	0	1	1	2	1	1	5	2
168	1	3	37	6	1	2	1	4	9	72	2	2	1	1	3	1	1	0	1	4	1	1	2	1	3	10000	3	10000	3	1	2	2	30/8/2559	31/8/2559	2	2	1	2	4	1	2	4	2	0	0	1	1	5	2
169	1	2	37	6	1	1	4	7	25	110	2	1	1	1	4	2	2	5	1	3	1	1	2	1	4	20000	5	8000	2	2	2	4	240856	240856	1	2	1	2	5	2	0	0	1	1	1	1	1	4	2
170	1	2	50	11	3	1	2	7	10.5	88	2	1	1	1	2	2	1	0	1	7	1	1	2	1	4	10000	4	10000	4	3	2	4	27/8/2559	29/8/2559	3	2	1	1	7	2	0	0	1	1	1	1	1	4	1
171	1	3	5	1	1	2	2	8	13	110	1	1	1	1	4	2	1	0	1	10	2	2	1	1	4	5000	4	5000	2	1	2	2	241039	241039	1	2	1	1	5	1	1	5	1	1	1	1	1	4	1
172	1	3	5	1	1	2	0	5	7	55	1	2	1	1	3	1	1	0	1	10	2	1	2	1	4	9000	4	5000	2	1	2	1	240978	241039	1	2	1	2	2	1	1	3	1	1	2	1	1	3	1
173	1	2	5	1	1	2	6	0	42	120	1	1	1	1	3	1	1	0	1	10	2	1	2	1	4	9000	4	5000	2	1	2	1	241039	24/9/2559	1	2	1	1	5	1	1	5	2	0	0	1	1	4	2
174	1	3	5	1	1	1	6	0	21	12	2	2	1	1	4	1	1	0	1	7	1	1	2	1	5	8000	5	8000	2	1	2	1	23/9/2559	27/9/2559	3	2	1	4	4	1	4	4	1	1	3	1	5	3	1
175	1	3	5	1	1	2	3	0	15	98	1	2	1	1	4	1	1	0	1	7	1	2	2	1	5	8000	5	8000	2	1	2	1	25/9/2559	27/9/2559	3	2	1	4	4	1	4	4	1	1	3	1	3	3	2
176	1	3	5	1	1	2	8	0	25	133	1	1	1	1	4	1	1	0	1	7	1	1	2	1	5	8000	5	8000	2	2	2	1	22/9/2559	27/9/2559	6	2	1	5	3	1	5	3	1	1	4	1	5	3	2
177	1	2	51	1	1	1	2	5	14	84	2	1	1	1	3	2	1	0	1	2	1	2	2	2	4	15000	2	20740	2	6	2	4	240765	240796	1	2	2	0	0	2	0	0	1	1	5	1	1	5	1
178	1	3	51	1	1	1	2	10	14	85	2	1	1	1	2	2	1	0	1	5	1	2	4	1	4	10000	4	10000	2	5	2	4	240706	240826	1	1	2	0	0	2	0	0	2	0	0	1	1	3	2
179	1	2	52	5	1	1	2	11	14	93	2	2	1	1	4	2	1	0	1	6	1	1	2	1	6	10000	6	7200	3	1	2	4	240737	240765	1	2	1	2	6	1	2	6	1	1	3	1	2	5	1
180	1	1	34	13	1	1	3	7	17	110	2	1	1	1	2	2	1	0	1	3	1	1	2	1	5	15000	5	15000	3	2	2	3	240857	240887	1	2	1	1	5	2	0	0	1	2	2	1	2	3	2
181	1	1	42	12	1	1	0	11	6	60	2	2	2	1	4	1	1	0	1	15	5	1	2	1	3	3000	3	3000	1	3	2	4	240796	240857	1	2	1	1	4	2	0	0	1	1	2	1	1	3	2
182	1	3	53	12	1	2	3	1	15	90	2	1	1	1	1	2	1	0	1	6	2	1	2	1	4	8000	4	10000	3	2	2	2	240707	240707	1	2	1	1	7	2	0	0	2	0	0	1	1	7	1
183	1	3	53	12	1	1	3	0	12	96	2	1	1	1	3	2	1	0	1	6	1	1	2	1	4	12000	4	12000	2	3	2	1	241001	241001	1	2	1	1	7	2	0	0	2	0	0	1	1	4	2
184	1	3	53	12	1	1	3	8	19	120	2	1	2	2	3	2	1	0	1	4	1	2	2	1	3	10000	4	6000	3	2	2	3	241001	241001	1	2	1	1	2	2	0	0	2	0	0	1	1	4	2
185	1	3	5	5	1	1	2	9	12	89	1	2	1	1	4	1	1	0	1	5	1	1	2	1	3	15000	5	15000	2	4	2	4	240987	240987	1	2	2	0	0	1	1	5	1	1	2	1	3	4	2
186	1	3	53	12	1	1	2	9	14	888	2	1	1	1	3	2	1	0	1	4	1	1	4	1	4	1000	4	12000	3	1	2	3	241006	241007	1	2	1	1	2	2	0	0	1	1	1	1	1	2	2
187	1	2	53	12	1	2	2	8	12	49	2	1	1	1	4	2	1	0	1	6	1	1	4	1	1	888	1	888	3	1	2	3	241007	241007	1	2	2	0	0	2	0	0	2	0	0	1	1	6	2
188	1	1	53	12	1	1	4	1	14	98	2	1	1	1	4	2	1	0	1	4	1	1	2	1	4	888	4	12000	3	2	2	4	6/11/1559	61007	1	2	1	1	6	2	0	0	2	0	0	1	1	6	2
189	1	2	53	12	1	2	3	2	11	94	2	1	1	1	4	2	1	0	1	4	1	1	4	1	1	888	1	888	2	2	2	3	241006	241007	2	2	1	1	9	2	0	0	1	1	1	1	1	7	2
190	1	2	53	12	1	1	3	11	12	92	2	1	1	1	4	2	1	0	1	4	1	1	4	1	1	888	4	6000	2	2	2	2	241007	241007	1	2	1	1	2	2	0	0	2	0	0	1	1	2	2
191	1	2	53	12	1	1	3	7	13	93	2	1	1	1	4	2	1	0	1	5	1	1	2	1	4	20000	4	20000	2	4	2	4	241007	241008	2	2	1	1	7	1	1	7	1	1	1	1	1	7	2
192	1	3	53	12	1	2	3	0	11	70	2	1	1	1	2	2	2	1	1	3	1	1	2	1	4	18000	4	18000	3	2	2	3	241007	241007	1	2	2	0	0	2	0	0	1	1	1	2	0	0	1
193	1	2	53	12	1	1	3	4	13	96	2	1	1	1	4	2	1	0	1	4	1	1	2	1	4	8000	4	8000	2	2	2	4	241007	241007	1	2	1	1	5	2	0	0	2	0	0	1	1	3	2
194	1	2	53	12	1	2	2	0	9.5	87	2	1	1	1	4	1	1	0	1	4	1	1	2	1	4	888	1	888	2	5	2	1	241008	241008	1	2	1	1	1	2	0	0	2	0	0	1	1	1	2
195	1	2	53	12	1	2	3	0	11	89	2	1	1	1	4	2	1	0	1	8	2	1	2	1	4	888	4	888	2	3	2	4	241008	241008	1	1	1	1	1	2	0	0	2	0	0	1	1	1	2
196	1	3	53	12	1	1	3	0	12	89	2	1	1	1	4	2	1	0	1	3	1	1	4	1	1	888	1	888	3	3	2	3	241006	241007	2	2	1	1	7	2	0	0	2	0	0	1	1	6	2
197	1	2	54	2	1	1	1	3	8	75	2	2	1	1	4	1	1	0	1	3	0	1	2	1	3	4000	4	7000	3	1	2	3	241001	241007	5	2	1	3	5	2	0	0	1	1	3	1	3	5	2
198	1	3	1	1	1	1	1	2	9	80	1	2	1	1	4	1	1	0	1	4	1	1	2	1	4	8000	1	888	2	1	2	1	241005	241007	2	2	1	1	7	2	0	0	2	0	0	1	1	7	2
199	1	1	1	1	1	2	2	2	11	87	1	2	1	1	4	1	1	0	1	3	1	1	2	1	4	25000	1	888	2	1	2	1	241003	241008	3	2	1	1	7	2	0	0	2	0	0	1	1	7	2
200	1	3	55	12	1	1	3	2	17	70	2	2	1	1	2	3	1	0	1	3	1	1	2	1	4	888	4	888	3	2	2	4	241009	241009	1	2	1	#NULL!	#NULL!	2	0	0	1	#NULL!	#NULL!	1	#NULL!	#NULL!	2
201	1	2	56	4	1	1	1	4	9	78	2	2	1	1	3	1	1	0	1	5	1	1	2	1	4	9000	1	888	2	1	2	4	241014	241015	2	2	1	1	7	1	1	7	1	1	1	1	2	2	2
202	1	1	32	12	1	1	2	0	11	100	1	1	1	1	4	1	1	0	1	4	2	1	2	1	4	888	4	888	4	1	2	1	241011	241011	1	2	1	1	3	2	0	0	1	1	3	1	1	5	2
203	1	2	40	12	1	1	4	0	25	114	2	1	1	1	3	3	1	0	1	5	1	1	2	1	5	20000	4	15000	2	6	2	4	241015	241015	1	2	1	1	3	1	1	4	1	1	2	1	1	4	2
204	1	2	33	12	1	1	5	0	14	120	2	1	1	1	4	3	1	0	1	5	1	1	2	1	3	13000	3	13000	2	3	2	4	241015	241015	1	2	1	2	4	2	0	0	1	2	3	1	1	3	2
205	1	1	57	5	1	2	4	6	19	103	1	1	1	1	3	2	1	0	1	8	0	2	2	1	3	888	3	888	1	2	2	1	241029	241029	1	2	1	1	1	2	0	0	2	0	0	1	1	1	2
206	1	3	57	5	1	1	7	9	25	127	1	1	1	1	4	3	2	2	2	4	0	2	2	1	4	888	5	888	2	3	2	1	241029	241029	1	2	1	2	1	2	0	0	1	1	1	1	2	1	2
207	1	3	57	5	1	1	2	6	14	92	1	1	1	1	3	2	1	0	1	4	1	1	4	1	4	888	1	888	3	2	2	1	241021	241021	1	2	1	1	1	2	0	0	2	0	0	1	1	1	2
208	1	2	5	1	1	1	8	9	20	123	1	1	1	1	4	3	2	1	1	5	1	1	2	1	5	15000	4	22000	2	6	2	4	241024	241025	2	2	1	2	4	1	2	4	2	0	0	1	1	6	2
209	1	1	5	1	1	2	1	2	8	71	1	2	1	1	4	1	1	0	1	3	1	1	2	1	4	9000	1	888	2	1	2	1	241015	241017	3	2	1	1	7	2	0	0	2	0	0	2	0	0	2
210	1	2	1	1	1	2	4	0	17	120	1	1	1	1	2	1	1	0	1	8	1	1	2	1	5	15000	5	15000	2	1	2	1	241013	241013	1	3	1	1	3	2	0	0	2	0	0	1	1	4	2
211	1	2	1	1	1	1	1	0	10	64	1	1	1	1	4	1	2	1	1	5	1	1	2	1	4	10000	5	30000	2	6	2	4	241008	241011	4	2	1	1	5	2	0	0	1	1	5	1	2	5	2
212	1	3	5	1	1	2	6	9	19	100	1	1	1	1	4	3	1	0	1	4	1	1	2	1	4	30000	6	12000	2	4	2	1	241015	241015	1	2	1	1	4	1	1	4	1	1	3	1	1	5	1
213	1	1	58	1	1	1	3	6	25	105	2	1	1	1	2	2	1	0	1	9	3	1	2	1	3	1000	3	1000	2	2	2	1	241015	241016	2	2	2	0	0	2	0	0	2	0	0	2	0	0	2
214	1	1	58	1	1	1	3	6	16	100	2	1	1	1	2	2	1	0	1	9	3	1	2	1	3	1000	3	1000	2	2	2	1	241015	241016	2	2	1	#NULL!	#NULL!	2	0	0	1	#NULL!	#NULL!	1	#NULL!	#NULL!	2
215	1	3	59	5	1	1	1	2	8	74	1	2	1	1	3	1	1	0	1	3	0	1	2	1	1	888	4	15000	2	2	2	4	241030	241030	1	2	2	0	0	2	0	0	2	0	0	1	1	4	2
216	1	3	59	5	1	1	1	6	11	78	2	1	1	1	3	2	1	0	1	7	3	1	1	1	3	3000	4	10000	3	2	2	1	241036	241036	1	2	1	1	3	2	0	0	1	1	2	1	1	3	2
217	1	2	1	1	1	1	2	10	13	100	1	1	1	1	4	2	1	0	1	6	1	1	2	1	5	12000	6	10000	2	5	2	1	241034	241037	4	2	1	1	4	2	0	0	1	1	2	1	1	4	2
218	1	1	57	5	1	2	5	1	17	108	1	1	1	1	4	3	1	0	1	5	0	1	2	1	4	12000	4	12000	2	2	2	1	241028	241030	3	2	1	1	2	2	0	0	1	1	1	1	1	3	2
219	1	3	46	5	1	1	3	3	13	95	1	1	1	1	2	2	1	0	1	4	1	2	2	1	4	15000	1	888	2	4	2	1	241045	241045	1	2	1	1	3	2	0	0	1	1	1	1	1	3	2
220	1	3	46	5	1	2	3	1	12	90	2	1	1	1	3	3	1	0	2	3	0	1	2	1	4	888	4	888	3	1	2	4	241042	241042	1	2	1	2	3	2	0	0	2	0	0	1	2	4	2
221	1	1	59	5	1	1	2	6	14	93	2	2	1	1	2	1	1	0	1	5	1	1	2	1	3	12000	3	12000	3	2	2	4	241044	231472	2	2	1	1	4	2	0	0	2	0	0	1	1	5	2
222	1	3	60	5	1	2	3	4	13	92	2	1	1	1	2	2	1	0	1	7	1	2	2	1	4	12000	4	12000	3	2	2	4	241049	241049	1	2	2	0	0	2	0	0	1	1	2	1	1	3	2
223	1	1	60	5	1	1	4	5	17	107	2	1	1	1	2	2	1	0	1	4	1	1	2	1	4	15000	4	15000	3	5	2	4	241049	241049	1	2	1	1	3	2	0	0	1	1	1	1	1	3	2
224	1	2	60	5	1	2	4	2	18	102	2	1	1	1	4	2	1	0	1	3	1	1	2	1	4	10000	6	0	2	3	2	2	241050	241050	1	2	2	0	0	2	0	0	2	0	0	2	0	0	2
225	1	1	60	5	1	1	3	7	11	88	2	1	1	1	1	2	1	0	2	5	1	2	2	1	4	6000	4	5000	2	1	2	4	241050	241032	1	2	1	1	6	2	0	0	1	1	1	1	1	4	2
226	1	2	60	5	1	1	9	0	26	134	2	1	1	1	4	3	1	0	1	4	0	1	2	1	4	9000	4	8000	2	5	2	4	241051	241052	3	2	1	2	3	2	0	0	1	1	5	1	2	6	1
227	1	2	1	1	1	2	0	11	9	70	1	2	1	1	4	1	1	0	1	4	1	1	2	1	4	7500	1	0	2	1	2	1	241047	241049	2	2	1	1	5	1	1	7	1	1	3	1	1	5	2
228	1	1	46	5	1	2	2	2	12	94	1	1	1	1	3	2	1	0	1	6	2	1	2	1	5	888	5	888	2	5	1	4	241053	241053	1	2	1	1	1	2	0	0	2	0	0	1	1	1	2
229	1	2	46	5	1	1	2	6	13	84	1	1	1	1	3	2	1	0	1	6	1	1	2	1	4	888	4	888	2	3	2	4	241053	241053	1	2	2	0	0	2	0	0	1	#NULL!	#NULL!	1	#NULL!	#NULL!	2
230	1	3	46	5	1	1	2	3	11	85	1	1	1	1	3	2	1	0	1	7	2	2	2	1	5	888	5	888	3	4	2	4	241051	241053	1	2	1	3	1	2	0	0	1	3	1	1	2	1	2
231	1	3	46	5	1	1	2	4	10	92	1	1	1	1	3	2	1	0	1	4	1	2	4	1	4	888	4	888	2	3	2	2	241053	241053	1	2	1	1	1	2	0	0	1	1	1	1	1	1	2
232	1	2	46	5	1	2	2	6	10	90	1	1	1	1	3	2	1	0	1	6	1	1	2	1	4	888	4	888	2	3	2	4	241053	241053	1	2	2	0	0	2	0	0	1	#NULL!	#NULL!	1	#NULL!	#NULL!	2
233	1	3	52	5	1	1	2	10	16	95	2	1	1	1	3	2	1	0	1	3	0	1	4	1	1	888	4	888	3	2	2	4	241066	241066	1	2	1	1	1	1	#NULL!	#NULL!	2	0	0	1	#NULL!	#NULL!	2
234	1	3	52	5	1	1	2	8	12	82	2	1	2	3	4	2	1	0	1	5	0	1	2	1	4	888	4	888	2	1	2	4	241066	241066	1	2	1	1	1	2	0	0	2	0	0	1	1	1	2
235	1	2	52	5	1	1	4	0	18	110	2	1	1	1	3	1	1	0	1	5	1	1	2	1	4	888	4	888	2	5	2	2	241066	241066	1	2	1	1	5	2	0	0	1	1	5	2	0	0	2
236	1	3	52	5	1	1	2	10	14	91	2	1	1	1	3	2	1	0	1	3	0	1	4	1	1	888	4	888	3	2	2	4	241066	241066	1	2	1	1	1	1	#NULL!	#NULL!	2	0	0	1	#NULL!	#NULL!	2
237	1	3	60	5	1	1	2	11	10	90	2	1	1	1	4	2	1	0	1	6	2	1	4	1	1	888	4	5000	2	2	2	2	241060	241062	3	2	1	1	5	2	0	0	1	1	2	1	1	4	2
238	1	3	60	5	1	2	2	11	14	99	2	1	1	1	2	2	1	0	1	6	1	1	2	1	4	9000	5	6000	2	4	2	4	241064	241065	2	2	1	1	3	2	0	0	2	0	0	1	1	3	2
239	1	1	60	5	1	1	3	5	15	95	2	1	1	1	3	2	1	0	1	4	1	2	2	1	5	10000	5	10000	2	3	2	4	241064	241065	2	2	1	1	3	2	0	0	1	1	2	1	1	7	2
240	1	2	52	5	1	1	3	9	20	105	2	1	1	1	4	2	1	0	1	5	1	2	2	1	3	10000	3	888	2	4	2	1	241057	241059	3	2	1	1	7	2	0	0	1	1	4	1	1	7	2
241	1	2	1	1	1	2	3	5	10	88	1	1	1	1	4	2	1	0	1	3	1	1	2	1	4	3000	1	0	2	1	2	1	241075	241076	2	3	1	1	3	2	0	0	1	1	1	1	1	3	2
242	1	2	1	1	1	2	1	1	9	85	1	2	1	1	4	1	1	0	1	5	1	1	2	1	4	9000	1	0	2	4	2	1	241078	241081	4	3	1	#NULL!	#NULL!	1	#NULL!	#NULL!	1	#NULL!	#NULL!	1	#NULL!	#NULL!	2
243	1	2	61	1	1	1	1	11	10	77	2	1	1	1	4	1	1	0	1	5	0	1	2	1	4	8900	4	6500	2	1	2	4	241071	241071	1	3	1	1	3	2	0	0	2	0	0	1	1	2	2
244	1	2	61	1	1	1	1	7	9	72	1	2	1	1	4	1	1	0	1	12	3	1	2	2	3	3000	3	3000	2	1	2	1	241071	241071	1	2	1	1	4	2	0	0	1	1	4	1	1	2	1
245	1	1	5	1	1	2	2	10	14	90	1	2	1	1	4	1	1	0	1	5	1	1	2	1	4	7500	4	5000	2	1	2	1	241088	241089	2	2	1	1	7	2	0	0	1	1	1	1	1	3	2
246	1	2	5	1	1	1	2	2	11	65	2	1	1	1	4	2	1	0	1	4	2	1	2	1	4	3500	1	0	2	1	2	1	241058	241058	1	2	1	1	3	1	1	2	2	0	0	2	0	0	2
247	1	1	62	15	1	2	2	5	11	83	1	1	1	1	4	2	1	0	1	4	0	1	2	1	4	9000	4	888	4	3	2	4	241071	241073	3	2	1	1	3	2	0	0	1	1	3	1	1	3	2
248	1	2	20	10	3	1	3	6	12	94	1	1	1	1	2	1	1	0	1	6	2	2	1	1	4	888	5	888	3	2	1	4	241063	241063	1	2	1	1	1	1	1	1	2	0	0	1	1	1	1
249	1	3	20	10	3	1	1	5	11	65	2	2	1	1	4	1	1	0	1	3	1	1	2	1	5	50000	5	50000	3	2	2	4	241074	241074	1	2	1	#NULL!	#NULL!	2	0	0	1	#NULL!	#NULL!	1	#NULL!	#NULL!	2
250	1	3	47	6	1	1	3	6	15	98	1	1	1	1	3	2	1	0	1	4	1	2	2	1	2	6000	1	0	2	5	2	1	241084	241084	1	2	2	0	0	2	0	0	2	0	0	1	1	6	2
251	1	2	47	6	1	1	3	0	12	90	1	1	1	1	4	2	1	0	1	5	0	2	2	1	3	5000	3	7000	2	3	2	2	241082	241082	1	3	1	1	5	2	0	0	1	1	5	1	1	5	2
252	1	2	47	6	1	2	4	0	17	101	1	1	1	1	4	2	1	0	1	3	1	2	2	1	3	888	3	888	3	2	2	2	241084	241084	1	2	2	0	0	2	0	0	2	0	0	1	1	1	1
253	1	3	47	6	1	1	3	0	16	93	1	1	1	1	4	2	1	0	1	4	1	1	4	1	4	888	3	888	2	4	2	2	241080	241081	2	2	1	1	1	2	0	0	1	1	1	2	0	0	2
254	1	2	47	6	1	1	4	0	19	102	1	1	1	1	2	2	1	0	1	7	0	1	2	1	4	10000	6	0	2	2	2	1	241081	241081	1	2	1	1	3	2	0	0	1	1	3	1	1	3	2
255	1	3	47	6	1	1	3	10	14	99	1	1	1	2	4	1	1	0	1	3	1	1	2	1	4	888	4	888	3	2	2	4	241084	241084	1	1	2	0	0	2	0	0	2	0	0	1	1	1	2
256	1	2	47	6	1	2	3	9	15	888	1	1	2	1	2	1	1	0	1	4	1	1	2	1	3	4000	3	4000	3	2	2	4	241084	241084	1	2	1	1	1	2	0	0	1	1	1	2	0	0	2
257	1	3	47	6	1	2	3	0	12	888	1	1	1	1	2	2	1	0	1	5	1	1	2	1	2	20000	2	20000	3	2	2	4	241082	241084	4	2	1	1	7	2	0	0	1	1	3	1	1	7	2
258	1	2	47	6	1	1	1	11	13	85	1	1	1	1	4	2	1	0	1	4	0	1	2	1	4	6000	6	0	2	2	2	1	241082	241082	1	2	1	3	1	2	0	0	1	1	1	1	2	1	2
259	1	3	47	6	1	1	2	6	16	98	1	1	1	1	2	2	1	0	1	4	0	1	1	1	4	9000	4	888	4	3	2	2	241078	277602	1	2	1	1	1	2	0	0	1	1	3	1	1	7	2
260	1	2	47	6	1	2	2	9	11	92	1	1	1	1	4	2	1	0	1	4	0	1	2	1	4	5000	6	0	2	3	2	1	241081	241081	1	2	1	1	2	2	0	0	2	0	0	1	1	2	2
261	1	2	47	6	1	1	2	6	15	888	1	1	1	1	2	1	1	0	1	5	1	1	2	1	3	2500	3	2500	3	2	2	4	241084	241084	1	1	1	1	3	1	1	4	2	0	0	1	1	3	2
262	1	2	47	6	1	2	2	11	12	85	1	1	1	1	4	2	1	0	1	4	1	1	2	1	3	10000	3	10000	2	2	2	4	241081	241081	1	2	2	0	0	2	0	0	1	1	2	1	1	3	1
263	1	2	47	6	1	2	2	0	16	80	1	1	1	1	2	2	1	0	1	3	1	1	2	1	4	888	4	888	3	2	2	4	241081	241081	1	2	1	3	1	2	0	0	2	0	0	1	3	1	2
264	1	2	47	6	1	1	2	7	10	80	1	1	1	1	4	1	1	0	1	13	2	1	2	1	3	888	3	888	2	2	2	3	241084	241084	1	1	2	0	0	2	0	0	1	2	1	1	1	1	2
265	1	3	47	6	1	2	2	6	10	82	1	1	1	1	4	2	1	0	1	6	1	1	2	1	3	888	3	888	3	2	2	4	241084	241084	1	2	2	0	0	2	0	0	2	0	0	1	1	1	2
266	1	2	47	6	1	2	4	0	17	105	1	1	1	1	4	2	1	0	1	4	0	2	1	1	4	15000	6	0	2	6	2	1	241082	241082	1	2	1	3	1	2	0	0	2	0	0	1	2	1	2
267	1	2	47	6	1	2	3	0	13	90	1	1	1	2	4	1	1	0	1	8	1	1	2	1	3	888	3	888	3	2	2	3	241084	241084	1	1	2	0	0	2	0	0	1	1	1	2	0	0	2
268	1	3	47	6	1	2	3	0	12	90	1	1	1	3	4	1	1	0	1	3	1	1	2	1	3	888	3	888	3	2	2	3	241084	241084	1	1	2	0	0	2	0	0	2	0	0	1	1	1	2
269	1	2	47	6	1	2	2	11	11	85	1	1	1	1	2	2	1	0	1	5	1	1	2	1	6	888	4	6000	3	2	2	2	241084	241084	1	2	1	#NULL!	#NULL!	2	0	0	2	0	0	1	1	1	2
270	1	3	47	6	1	1	3	0	16	101	1	1	1	2	4	1	1	0	1	6	2	1	2	1	3	888	3	888	2	2	2	3	241084	241084	1	2	2	0	0	2	0	0	2	0	0	1	1	1	2
271	1	2	52	5	1	1	3	6	18	100	2	1	1	1	2	2	1	0	1	6	1	1	2	1	1	888	4	9000	3	2	2	3	241075	241076	2	2	1	1	7	2	0	0	2	0	0	1	1	7	2
272	1	3	52	5	1	1	2	8	15	98	2	1	1	1	2	2	1	0	1	3	1	1	2	1	4	888	4	888	3	1	1	4	241071	241073	3	2	1	3	1	2	0	0	1	1	1	1	1	1	2
273	1	1	60	5	1	1	3	10	14	100	2	1	1	1	2	2	1	0	1	4	1	1	4	1	4	9000	1	888	1	3	2	1	241085	241086	2	2	1	1	4	2	0	0	2	0	0	1	1	1	2
274	1	2	60	5	1	1	0	7	9	71	2	1	1	1	2	1	1	0	1	4	1	1	2	1	4	10000	4	10000	3	2	2	3	241083	241084	1	2	1	1	2	2	0	0	1	1	3	1	1	3	2
275	1	3	60	5	1	1	4	1	14	103	2	1	1	1	2	2	1	0	1	6	2	2	2	1	4	10000	4	10000	3	2	2	3	241085	25/01/25560	1	2	1	1	7	2	0	0	1	1	7	1	1	7	2
276	1	3	60	5	1	2	2	7	10	88	2	1	1	1	4	2	1	0	1	5	1	1	2	1	4	20000	1	9000	4	2	2	4	241085	241086	2	2	1	1	4	2	0	0	1	1	3	1	1	3	2
277	1	3	60	5	1	1	3	5	15	95	2	1	1	1	3	2	1	0	1	6	1	2	2	1	4	10000	5	6000	4	1	2	3	888.	888.	#NULL!	#NULL!	#NULL!	#NULL!	#NULL!	#NULL!	#NULL!	#NULL!	#NULL!	#NULL!	#NULL!	#NULL!	#NULL!	#NULL!	#NULL!
278	1	3	60	5	1	2	4	4	18	105	2	1	1	1	2	2	1	0	1	5	1	1	2	1	4	10000	4	6000	2	3	2	4	888.	888.	#NULL!	#NULL!	#NULL!	#NULL!	#NULL!	#NULL!	#NULL!	#NULL!	#NULL!	#NULL!	#NULL!	#NULL!	#NULL!	#NULL!	#NULL!
279	1	2	60	5	1	2	3	2	14	90	2	1	1	1	3	2	1	0	1	3	1	1	2	1	4	9000	4	9000	3	2	2	3	888.	888.	#NULL!	#NULL!	#NULL!	#NULL!	#NULL!	#NULL!	#NULL!	#NULL!	#NULL!	#NULL!	#NULL!	#NULL!	#NULL!	#NULL!	#NULL!
280	1	3	60	5	1	2	3	6	14	9	2	1	1	1	3	2	1	0	1	4	1	1	2	1	4	15000	5	10000	2	1	2	4	888.	888.	#NULL!	#NULL!	#NULL!	#NULL!	#NULL!	#NULL!	#NULL!	#NULL!	#NULL!	#NULL!	#NULL!	#NULL!	#NULL!	#NULL!	#NULL!
281	1	2	52	5	1	2	4	0	16	90	2	2	1	1	4	2	1	0	1	2	1	2	2	1	4	5000	4	888	2	1	2	4	241062	241062	1	2	1	1	4	2	0	0	2	0	0	1	1	1	2
282	1	1	47	6	1	1	4	3	13	95	1	2	1	1	4	2	1	0	1	3	0	1	2	1	3	3000	4	888	2	2	2	1	240726	241091	1	2	1	2	1	2	0	0	1	1	1	1	3	1	2
283	1	3	26	12	1	2	3	0	13	90	2	2	1	1	2	2	1	0	1	5	0	2	2	1	4	888	4	888	4	5	2	4	241091	241093	3	2	1	#NULL!	#NULL!	2	0	0	2	0	0	2	0	0	2
284	1	3	31	12	1	2	3	7	14	106	2	1	1	1	4	2	1	0	1	6	0	1	4	1	4	888	4	888	3	2	2	4	241084	241085	2	2	2	0	0	2	0	0	1	1	1	1	1	1	2
285	1	2	31	12	1	1	1	2	9	888	2	2	1	1	4	1	1	0	1	5	1	1	2	1	6	12000	6	12000	3	1	2	4	241086	241086	1	2	1	1	3	2	0	0	1	1	1	2	0	0	2
286	1	3	47	6	1	2	5	0	97	120	1	1	1	1	4	1	1	0	1	5	2	1	2	1	3	9000	1	0	2	4	2	4	241082	241085	4	2	1	1	1	2	0	0	1	1	3	1	1	4	2
287	1	3	47	6	1	1	1	4	10	79	1	1	1	1	4	1	1	0	1	6	2	1	2	1	4	9000	3	888	4	3	2	4	241083	241084	2	2	1	1	2	2	0	0	1	1	3	1	1	3	2
288	1	3	47	6	1	1	3	0	15	100	1	2	1	1	2	2	1	0	1	3	1	1	2	1	3	888	3	888	3	5	2	4	241084	241087	3	2	1	#NULL!	#NULL!	2	0	0	1	#NULL!	#NULL!	2	0	0	1
289	1	2	38	14	3	1	2	2	11	84	2	2	1	1	4	1	1	0	1	7	0	1	2	1	4	10000	1	0	2	3	2	2	241085	241086	2	2	2	0	0	2	0	0	2	0	0	1	1	3	2
290	1	2	5	1	1	2	1	0	6	74	1	2	1	1	2	1	1	0	1	4	2	1	2	1	4	20000	1	0	2	1	2	1	241097	241098	2	3	1	1	4	2	0	0	1	1	2	2	0	0	2
291	1	1	5	1	1	1	2	2	12	87	1	1	1	1	4	2	1	0	1	4	1	2	2	1	5	6000	5	6000	2	4	2	4	241096	241245	1	2	1	1	4	2	0	0	1	1	2	1	1	3	2
292	1	2	1	1	1	1	1	2	12	80	1	2	1	1	2	1	1	0	1	12	1	1	2	1	4	10000	5	5000	2	4	2	1	241091	241092	2	2	1	1	5	1	1	4	2	0	0	1	1	5	1
293	1	2	6	1	1	2	2	3	13	91	2	1	1	1	3	2	1	0	1	4	1	1	2	1	4	15000	4	15000	2	6	2	4	241092	241092	1	3	1	2	5	1	3	4	2	0	0	1	1	3	2
294	1	2	59	5	1	1	3	0	14	93	1	1	1	1	4	2	2	3	2	4	1	1	2	1	4	12000	4	12000	2	4	2	4	241097	241098	2	2	2	0	0	2	0	0	1	1	3	1	1	4	2
295	1	2	59	5	1	1	3	1	14	98	1	1	1	1	4	2	1	0	1	6	1	1	4	1	3	9000	3	9000	2	3	2	2	241098	241098	1	2	1	1	5	2	0	0	2	0	0	1	1	5	2
296	1	2	59	5	1	2	4	2	14	100	1	1	1	1	4	2	1	0	1	5	1	2	2	1	4	15000	4	15000	2	1	2	4	241097	241097	1	2	1	1	5	2	0	0	2	0	0	1	1	3	2
297	1	2	59	5	1	1	2	10	15	95	1	1	1	1	2	2	1	0	1	3	1	2	2	1	4	15000	4	15000	3	2	2	3	241097	241098	2	2	1	1	4	2	0	0	2	0	0	1	1	2	2
298	1	2	2	1	1	2	1	6	11	82	2	2	1	1	4	1	1	0	1	5	1	1	2	1	3	9000	1	0	2	1	2	1	241134	241137	1	2	1	1	4	2	0	0	2	0	0	1	1	3	2
299	1	2	2	1	1	2	1	1	7	76	2	2	1	1	4	1	1	0	1	4	1	1	2	1	4	9000	1	0	2	1	2	1	241132	241134	3	2	1	1	2	2	0	0	1	1	2	1	1	4	2
300	1	5	1	1	1	2	1	9	10	78	1	2	1	1	4	1	1	0	1	5	1	1	2	1	4	5000	1	0	2	1	2	1	241128	241130	2	2	1	1	2	2	0	0	2	0	0	1	1	1	1
301	1	2	5	1	1	1	2	8	15	101	1	1	1	1	3	2	1	0	1	3	1	1	2	1	4	10000	4	10000	3	1	2	4	241111	241112	2	2	1	1	4	2	0	0	1	1	2	1	1	3	2
302	1	2	51	1	1	1	2	6	20	108	2	1	1	1	4	2	1	0	1	5	1	1	2	1	5	8000	5	8000	2	4	2	4	241110	241111	2	2	1	1	2	1	1	1	1	1	1	1	1	3	2
303	1	2	2	1	1	1	9	0	23	125	2	1	1	1	3	3	1	0	1	7	1	1	2	1	4	15000	4	10000	2	4	2	1	241103	241108	5	2	2	0	0	2	0	0	1	1	2	1	1	3	1
304	1	2	1	1	1	2	3	0	12	79	1	2	1	1	4	1	2	1	1	6	2	1	2	1	4	7000	1	0	2	1	2	1	241147	241148	2	2	1	1	3	2	0	0	2	0	0	2	0	0	2
305	1	2	39	14	3	1	3	4	20	116	1	1	2	1	4	2	1	0	1	4	1	1	2	1	3	8000	3	8000	3	1	2	4	241139	241141	3	2	1	2	4	2	0	0	1	1	4	1	2	4	2
306	1	1	39	14	3	1	3	4	14	100	1	1	1	1	4	2	1	0	1	3	1	1	2	1	3	10000	3	10000	2	1	2	4	241141	241145	4	2	1	1	4	1	1	4	2	0	0	1	1	4	2
307	1	3	1	1	1	1	1	3	9.1	71	1	2	1	1	4	1	2	1	1	6	1	1	2	1	1	25000	4	888	3	2	1	4	240758	240759	1	2	1	1	5	2	0	0	2	0	0	2	0	0	2
308	1	3	2	1	1	2	3	0	14	98	1	1	1	1	3	3	1	0	1	4	1	1	2	1	5	17000	4	888	3	2	1	4	240758	240759	1	2	1	1	4	1	1	4	1	1	4	1	3	3	2
400	1	3	2	1	1	2	2	5	11.3	83	1	1	1	1	1	2	1	0	1	4	1	1	2	1	4	18400	4	888	3	2	1	4	240759	240762	1	2	1	1	5	1	1	5	1	1	3	1	3	3	2
401	1	3	3	2	1	1	3	7	13	95	1	1	1	1	4	2	1	0	1	4	1	2	2	1	3	6000	4	888	2	3	1	2	240761	240762	1	2	1	1	7	1	1	7	2	0	0	2	0	0	2
402	1	2	3	2	1	1	3	2	14.5	98	1	1	1	1	4	2	1	0	1	4	1	1	2	1	1	8000	1	888	2	3	1	4	240761	240762	1	2	1	2	6	2	0	0	2	0	0	1	1	7	1
403	1	1	3	2	1	1	1	4	11.5	83	1	1	1	1	3	2	1	0	1	3	1	1	2	1	3	8000	1	888	1	2	1	4	29/2/2559	240758	5	2	1	1	7	1	1	7	1	1	1	1	1	2	2
404	1	1	4	1	1	2	1	6	10	80	2	1	1	1	3	2	1	0	1	4	1	1	2	1	4	6000	4	888	2	4	1	4	240762	240762	1	2	1	1	5	1	1	5	1	1	3	1	1	5	1
405	1	1	5	1	1	1	2	5	12	95	1	1	1	1	2	2	2	1	1	4	1	1	2	1	4	20000	4	888	3	4	1	1	240764	240764	1	2	1	1	5	1	1	5	1	1	1	1	1	5	1
406	1	3	6	1	1	1	2	7	13	93	2	1	1	1	1	1	1	0	1	4	2	1	2	1	5	10000	4	888	2	1	1	1	240762	240762	1	2	1	1	5	2	0	0	1	1	3	1	1	5	2
407	1	3	7	3	1	2	4	8	15.3	98	2	2	1	1	4	3	1	0	1	7	4	1	2	1	4	12000	4	888	3	1	1	1	240767	240769	1	2	1	1	4	2	0	0	2	0	0	1	1	4	1
408	1	2	8	3	1	1	1	4	8.5	76	2	2	1	1	4	1	1	0	1	4	1	1	2	1	2	60000	1	888	3	6	1	1	240773	240776	1	2	2	0	0	2	0	0	1	1	4	1	4	4	2
409	1	3	8	3	1	1	7	0	19	121	2	1	1	1	4	1	1	0	1	5	1	2	2	1	5	50000	4	888	2	6	1	1	240778	240778	1	2	1	4	5	1	3	5	1	2	7	1	4	5	2
410	1	3	17	8	3	2	3	9	3.3	94	2	1	1	1	4	2	1	0	1	4	1	1	2	1	3	5000	3	5000	2	4	2	4	240701	240732	1	2	1	1	6	2	0	0	2	0	0	2	0	0	2
411	1	3	17	8	3	1	1	2	8.2	72	1	2	1	1	4	1	1	0	1	6	1	1	2	1	1	0	1	0	3	1	2	4	30/4/2559	240701	5	2	1	1	7	1	1	7	2	0	0	1	1	6	2
412	1	2	17	8	3	1	1	6	11	90	1	1	1	1	4	1	1	0	1	4	2	1	2	1	4	10000	1	0	2	4	2	4	13/4/2559	14/4/2559	2	3	1	2	3	1	2	3	1	1	1	1	2	3	2
413	1	1	18	9	3	1	2	2	12	85	2	1	1	1	4	2	1	0	1	4	2	1	2	1	6	20000	1	0	3	4	2	4	240821	240882	1	2	1	2	6	2	0	0	1	2	2	1	3	3	1
414	1	1	19	9	3	1	2	8	12	90	1	1	1	1	4	2	1	0	1	5	1	1	2	1	4	10000	1	0	2	2	2	1	240821	240913	1	2	1	1	5	1	1	5	1	2	3	2	0	0	2
415	1	2	20	10	3	1	2	8	12	100	2	1	1	1	4	2	1	0	1	4	1	1	2	1	3	20000	1	0	2	4	2	4	16/5/2559	17/5/2559	2	2	1	1	6	2	0	0	1	1	1	2	0	0	2
416	1	1	20	10	3	2	2	6	10	90	2	1	1	1	3	2	1	0	1	3	1	1	2	1	3	5000	1	0	3	1	2	4	14/5/2559	15/5/2559	2	2	1	1	7	1	1	7	1	1	2	1	1	6	2
417	1	3	17	8	3	1	3	5	15	114	1	1	1	1	2	2	1	0	1	4	1	1	2	1	4	8000	1	0	3	2	2	4	16/5/2559	17/5/2559	2	2	1	1	6	2	0	0	2	0	0	1	1	2	2
418	1	2	20	10	3	1	1	7	12	73	1	1	1	1	3	1	1	0	1	3	1	1	2	1	4	15000	1	0	3	2	2	4	24/5/2559	25/5/2559	2	2	1	1	6	1	1	1	1	1	6	2	0	0	2
419	1	2	20	10	3	1	2	8	15	101	1	1	1	1	1	2	1	0	1	6	1	1	2	1	4	12000	1	0	2	4	2	4	21/5/2559	22/5/2559	2	2	1	1	6	1	1	6	1	1	2	1	1	6	1
420	1	2	20	10	3	1	2	6	12	82	1	1	1	1	2	2	1	0	1	4	1	1	2	1	4	10000	1	0	2	3	2	1	22/5/2559	22/5/2559	2	2	1	1	7	1	1	7	1	1	1	2	0	0	2
421	1	3	20	10	3	2	4	0	13	90	2	1	1	1	2	3	1	0	1	3	1	1	4	1	2	5000	1	0	3	1	2	4	18/8/2559	22/8/2559	5	2	1	1	7	1	1	7	1	1	2	1	0	2	2
422	1	3	21	9	3	2	3	3	18	105	2	1	1	2	3	2	1	0	1	3	1	1	2	1	4	20000	1	0	3	4	2	4	24/5/2559	28/5/2559	5	2	2	0	0	2	0	0	1	1	1	1	1	7	1
423	1	1	22	9	3	1	2	11	12.2	90	2	1	1	2	4	2	1	0	1	6	2	1	2	1	1	0	1	0	1	4	2	4	29/5/2559	30/5/2559	2	2	1	2	6	2	0	0	2	0	0	1	1	7	2
424	1	3	21	9	3	2	0	11	8.2	70	2	2	1	1	3	1	1	0	1	4	1	1	4	1	4	8000	1	0	3	2	2	4	26/5/2559	27/5/2559	2	2	2	0	0	2	0	0	1	1	5	1	2	6	2
425	1	2	21	9	3	2	3	6	18.2	103	2	1	1	1	3	2	1	0	1	3	1	1	2	1	3	8000	1	0	2	2	2	4	25/5/2559	29/5/2559	5	2	2	0	0	2	0	0	1	1	7	1	5	3	1
426	1	3	21	9	3	1	1	6	10	80	2	1	1	1	2	1	2	2	1	4	1	1	4	1	4	50000	1	0	3	2	2	4	30/5/2559	31/5/2559	2	2	2	0	0	2	0	0	1	1	2	1	1	5	1
427	1	1	23	11	3	2	1	2	9	68	1	1	1	1	4	1	1	0	1	10	2	1	2	1	3	10000	1	0	2	3	2	1	27/5/2559	29/5/2559	3	2	1	1	5	2	0	0	2	0	0	1	1	5	2
428	1	2	23	11	3	2	888	888	888	888	2	1	1	1	4	2	1	0	1	#NULL!	#NULL!	1	2	1	1	888	4	888	2	1	2	4	888.	888.	#NULL!	#NULL!	#NULL!	#NULL!	#NULL!	#NULL!	#NULL!	#NULL!	#NULL!	#NULL!	#NULL!	#NULL!	#NULL!	#NULL!	#NULL!
429	1	1	23	11	3	2	888	888	888	888	2	1	1	1	4	2	1	0	1	#NULL!	#NULL!	1	2	1	1	888	4	888	2	1	2	4	888.	888.	#NULL!	#NULL!	#NULL!	#NULL!	#NULL!	#NULL!	#NULL!	#NULL!	#NULL!	#NULL!	#NULL!	#NULL!	#NULL!	#NULL!	#NULL!
430	1	3	23	11	3	2	4	4	13	103	2	1	1	1	3	2	1	0	1	7	5	1	2	1	3	22000	1	0	3	2	2	4	30/4/2559	240852	6	3	1	1	7	2	0	0	1	1	1	2	0	0	2
431	1	2	23	11	3	1	3	0	15	90	2	1	1	1	4	2	1	0	1	4	2	2	2	2	2	17000	1	0	2	6	1	4	240733	240761	2	2	1	3	5	1	1	7	1	1	1	1	3	5	2
432	1	2	23	11	3	1	2	11	11	80	2	1	1	2	4	1	1	0	1	4	2	1	2	1	1	888	4	888	2	1	2	4	888.	888.	#NULL!	#NULL!	#NULL!	#NULL!	#NULL!	#NULL!	#NULL!	#NULL!	#NULL!	#NULL!	#NULL!	#NULL!	#NULL!	#NULL!	#NULL!
433	1	2	23	11	3	2	2	6	12	86	2	1	1	1	1	2	1	0	1	8	2	1	2	1	5	18000	1	0	2	5	2	1	888.	888.	#NULL!	#NULL!	#NULL!	#NULL!	#NULL!	#NULL!	#NULL!	#NULL!	#NULL!	#NULL!	#NULL!	#NULL!	#NULL!	#NULL!	#NULL!
434	1	2	20	10	3	1	1	0	8.4	60	2	2	1	1	4	2	1	0	1	4	2	2	2	1	4	12000	1	0	2	3	2	4	240792	240792	1	2	1	1	5	2	0	0	2	0	0	2	0	0	2
435	1	1	20	10	3	1	4	10	30	100	1	1	1	1	4	3	2	2	1	6	1	2	2	1	5	80000	1	0	3	2	2	4	240761	240792	1	2	1	2	6	1	3	5	1	1	2	1	1	7	2
436	1	3	20	10	3	1	4	0	25	95	1	1	1	1	4	3	1	0	1	3	1	2	2	1	5	10000	1	0	3	2	2	4	240822	240883	1	2	1	1	5	1	1	5	1	1	1	1	1	4	2
437	1	2	20	10	3	2	4	1	22	98	1	1	1	1	2	3	1	0	1	3	1	1	2	1	4	10000	1	0	3	2	2	4	240761	240792	1	2	1	1	7	2	0	0	1	1	1	1	1	3	2
438	1	2	20	10	3	2	3	4	12	90	2	1	#NULL!	1	1	2	1	0	1	5	2	1	2	1	6	9000	1	0	2	5	2	4	240761	240761	1	2	1	1	6	1	1	4	1	1	2	2	0	0	2
439	1	2	20	10	3	2	4	0	13	90	2	1	1	1	4	3	2	1	1	4	1	1	2	1	5	12000	1	0	2	4	2	2	30/6/2559	31/6/2559	2	2	1	1	7	2	0	0	1	1	1	2	0	0	2
440	1	3	20	10	3	2	3	0	13	88	2	1	1	1	2	2	1	0	1	5	2	1	2	1	3	30000	1	0	3	2	2	4	240822	240822	1	2	1	1	5	2	0	0	1	1	2	2	0	0	2
441	1	3	20	10	3	2	3	0	11	90	2	1	1	1	4	2	1	0	1	4	1	1	2	1	2	50000	1	0	3	2	2	4	240853	240853	1	2	1	1	6	2	0	0	1	1	1	2	0	0	2
442	1	3	20	10	3	2	3	2	20	95	1	1	1	1	2	2	1	0	1	3	1	2	2	1	4	5000	1	0	3	2	2	4	240822	240853	1	2	1	1	6	1	1	6	1	1	2	1	2	5	2
443	1	2	20	10	3	1	1	5	10.4	90	2	1	1	1	4	1	1	0	1	5	1	1	2	1	5	10000	1	0	2	1	2	4	240853	240853	1	2	1	1	6	2	0	0	1	1	2	1	1	5	2
444	1	3	24	11	3	1	1	6	11	76	2	2	1	2	1	1	1	0	1	12	2	1	1	1	5	5000	1	0	3	3	2	4	240822	240853	1	2	1	1	6	1	1	6	1	1	1	1	1	6	1
445	2	2	9	4	1	1	3	0	11	90	1	1	1	1	4	2	1	0	1	6	1	1	2	1	4	4000	4	888	2	4	2	4	31/5/2559	888.	#NULL!	1	1	7	2	2	0	0	2	0	0	2	0	0	2
446	1	2	9	4	1	1	0	11	8.4	74	1	2	1	1	3	1	1	0	1	5	1	1	2	1	4	15000	1	888	3	1	2	4	240761	240853	1	2	1	1	6	1	1	6	2	0	0	2	0	0	2
447	1	2	9	4	1	1	2	11	14	94	1	1	1	1	2	3	1	0	1	5	1	1	2	1	5	15000	4	888	3	4	2	4	240822	240914	1	2	1	3	3	2	0	0	1	1	2	1	1	5	2
448	1	2	10	5	1	1	1	7	12	80	1	1	1	1	3	1	1	0	1	5	1	2	2	1	4	20000	4	888	2	6	2	4	240883	240914	1	2	1	1	6	1	1	6	1	2	1	1	1	6	2
449	1	3	10	5	1	2	10	0	48	140	1	1	1	1	4	3	1	0	1	4	0	1	2	1	2	17000	1	888	2	6	2	4	240883	240914	1	2	1	1	5	2	0	0	1	1	1	1	1	5	2
450	1	3	11	4	1	2	2	2	10.7	83	1	1	1	1	4	2	1	0	1	8	2	1	2	1	4	30000	4	888	2	4	2	1	15/6/2559	17/6/2559	3	2	1	1	5	1	1	5	1	1	3	1	1	5	1
451	1	2	11	4	1	1	2	6	12	89	1	1	1	1	4	2	1	0	1	8	2	1	2	1	4	25000	4	888	2	4	2	4	17/6/2559	17/6/2559	1	2	2	0	0	2	0	0	1	1	5	1	3	3	1
452	1	3	12	4	1	2	2	6	14	94	2	1	1	1	2	2	1	0	1	3	1	1	2	1	4	9000	4	888	3	2	2	4	241036	24/6/2559	1	2	2	0	0	2	0	0	1	1	2	1	1	7	1
453	1	2	12	4	1	2	2	6	11	80	2	1	1	1	4	2	1	0	1	4	1	1	2	1	4	10000	4	888	2	1	2	4	19/6/2559	20/6/2559	2	2	1	2	6	2	0	0	1	1	3	1	1	6	1
454	1	1	12	4	1	2	1	7	9	90	2	2	1	2	4	1	1	0	1	4	1	1	2	1	4	9000	4	888	2	1	2	4	19/6/2559	21/6/2559	3	2	1	1	7	2	0	0	2	0	0	1	1	7	2
455	1	2	13	6	1	2	2	11	11.5	93	2	1	1	1	4	2	1	0	1	4	1	1	2	1	5	15000	4	888	2	2	2	4	22/6/2559	23/6/2559	2	2	1	1	6	1	1	6	1	1	2	1	1	6	2
456	2	2	13	6	1	2	2	8	10.1	83	2	1	1	1	4	2	1	0	1	5	1	2	2	1	1	9000	4	888	2	3	2	4	17/6/2559	888.	#NULL!	1	1	1	5	2	0	0	2	0	0	1	1	5	2
457	2	2	13	6	1	1	2	11	12	91	2	1	1	1	4	2	1	0	1	3	1	1	2	1	3	12000	1	888	2	4	2	1	18/6/2559	888.	#NULL!	1	2	0	0	2	0	0	1	1	4	2	0	0	2
458	1	2	13	6	1	1	4	0	18	105	2	1	1	1	4	2	1	0	1	7	1	2	2	1	3	14000	4	888	3	1	2	1	18/6/2559	19/6/2559	2	2	1	1	7	2	0	0	1	1	3	1	1	6	1
459	1	2	13	6	1	1	2	10	10.7	85	2	1	1	1	4	2	1	0	1	5	1	1	2	1	4	20000	4	888	2	4	2	4	22/6/2559	22/6/2559	1	2	1	1	5	2	0	0	2	0	0	2	0	0	2
460	1	888	25	9	3	1	2	8	14	87	2	1	1	1	4	1	1	0	1	4	3	1	2	1	4	50000	1	0	2	4	2	1	22/5/2559	22/5/2559	1	2	1	1	6	2	0	0	1	1	3	2	0	0	2
461	2	888	25	9	3	1	2	0	11	90	2	1	1	2	4	2	1	0	1	3	1	1	2	1	3	5000	3	888	2	1	2	4	27/6/2559	27/6/2559	1	1	1	1	6	1	1	6	2	0	0	2	0	0	2
462	2	888	25	9	3	2	3	2	14	93	2	1	1	1	4	1	1	0	1	4	3	1	2	1	3	10000	3	888	2	1	2	2	23/6/2559	24/6/2559	2	1	1	1	5	2	0	0	2	0	0	2	0	0	2
463	2	888	25	9	3	2	2	8	10.9	86	2	1	1	1	4	1	1	0	1	3	2	1	2	1	4	20000	1	888	2	1	2	4	27/6/2559	888.	#NULL!	1	1	1	6	1	1	6	1	1	2	1	1	6	2
464	1	888	25	9	3	2	3	0	11.2	90	2	1	1	3	2	2	1	0	1	8	3	1	2	1	4	30000	1	888	3	1	2	4	240870	240870	1	2	1	1	6	2	0	0	2	0	0	1	1	2	1
465	1	888	25	9	3	1	4	4	13	97	2	1	1	1	4	2	1	0	1	4	1	1	2	1	4	5000	4	888	2	3	2	4	240870	240870	1	2	1	1	5	2	0	0	2	0	0	1	1	5	2
466	1	888	25	9	3	2	4	104	2	16.2	1	1	1	1	4	1	1	0	1	4	2	1	2	1	4	50000	1	888	2	4	2	1	240866	240870	1	2	2	0	0	2	0	0	1	2	2	1	1	4	2
467	1	888	13	6	1	1	1	0	9.3	80	2	2	1	1	4	1	1	0	1	3	1	2	1	1	3	9000	4	888	2	1	2	4	240869	240870	1	2	2	0	0	2	0	0	2	0	0	1	1	2	1
468	1	2	13	6	1	1	2	10	13	95	2	1	1	1	4	2	1	0	1	4	2	1	2	1	1	888	6	9000	2	3	2	4	240874	240874	1	2	1	1	6	2	0	0	1	1	2	1	1	5	2
469	1	2	13	6	1	2	4	9	13.8	98	2	1	1	1	4	3	1	0	1	6	2	1	2	1	1	888	6	8000	2	4	2	4	240873	240873	1	2	1	2	6	2	0	0	2	0	0	2	0	0	1
470	1	2	13	6	1	2	4	9	14.1	98	2	1	1	3	4	2	1	0	1	#NULL!	#NULL!	1	2	1	1	888	1	888	2	1	2	4	888.	888.	#NULL!	#NULL!	#NULL!	#NULL!	#NULL!	#NULL!	#NULL!	#NULL!	#NULL!	#NULL!	#NULL!	#NULL!	#NULL!	#NULL!	#NULL!
471	1	888	14	6	1	2	2	2	12.4	86	2	1	1	3	4	2	1	0	1	7	2	1	2	1	4	8000	6	8000	2	6	2	1	240875	240875	1	2	1	1	5	2	0	0	2	0	0	2	0	0	2
472	1	888	15	4	1	2	1	7	10	88	1	1	1	1	4	2	1	0	1	3	1	1	2	1	3	50000	3	888	3	2	2	4	240871	240874	1	2	2	0	0	2	0	0	1	1	6	1	4	3	2
473	1	1	13	6	1	2	2	0	13	85	2	1	1	1	4	2	1	0	1	3	1	1	2	1	4	7000	4	7000	2	4	2	4	240873	240875	1	2	1	1	7	2	0	0	2	0	0	1	1	7	2
474	1	2	16	7	1	2	2	6	15	90	1	1	1	1	4	1	1	0	1	6	1	1	2	1	2	12000	2	12000	3	2	2	4	240876	240876	1	2	2	0	0	2	0	0	2	0	0	1	1	6	2
475	1	2	16	7	1	2	3	7	15	87	1	1	1	1	4	1	1	0	1	6	1	1	2	1	4	12000	4	888	2	4	2	4	240876	240876	1	2	1	1	6	1	1	2	2	0	0	1	1	6	2
476	1	2	16	7	1	1	2	4	11	87	1	1	1	1	4	1	1	0	1	3	1	1	2	1	4	15000	4	888	2	4	2	4	240875	240875	1	2	1	1	5	2	0	0	1	1	2	1	1	5	2
477	1	2	16	7	1	2	2	10	15	98	1	1	1	1	4	1	1	0	1	5	1	1	2	1	3	10000	3	888	3	2	2	4	240874	240874	1	2	1	3	2	2	0	0	1	1	1	1	1	4	2
478	1	2	16	7	1	2	4	0	15	97	1	1	1	1	3	1	1	0	1	3	1	1	2	1	4	6000	4	6000	3	1	2	4	28/6/2559	29/6/2559	2	2	1	1	7	2	0	0	2	0	0	1	1	7	2
479	1	2	26	12	1	1	3	6	14	95	2	2	1	1	2	2	1	0	1	5	1	1	2	1	4	12000	6	5000	2	3	2	4	240793	240823	1	2	1	1	4	1	1	2	1	1	1	1	1	5	2
480	1	2	27	13	1	2	2	5	14	92	2	1	1	1	4	3	1	0	1	5	1	1	2	1	3	6000	3	6000	2	1	2	4	28/6/2559	240703	5	2	1	3	4	2	0	0	1	1	1	1	3	4	2
481	1	2	28	13	1	1	4	1	16	101	2	1	1	1	4	2	1	0	1	4	1	2	2	1	3	7500	3	7500	2	1	2	4	240703	240703	1	2	1	1	3	2	0	0	2	0	0	2	0	0	2
482	1	2	27	13	1	1	2	10	12	87	1	1	1	1	2	2	1	0	1	#NULL!	#NULL!	1	2	1	4	888	4	888	3	1	2	4	240762	240793	1	2	1	1	#NULL!	2	#NULL!	#NULL!	1	1	#NULL!	1	1	#NULL!	2
484	1	2	28	13	1	2	2	2	11.5	86	2	1	1	1	4	2	1	0	1	4	1	1	2	1	4	10000	4	10000	2	4	2	4	240793	240823	1	2	1	1	7	2	0	0	2	0	0	1	1	7	2
485	1	2	27	13	1	2	3	9	888	888	1	1	1	1	4	2	1	0	1	4	1	1	2	1	4	888	4	888	3	1	2	4	240793	240823	1	2	1	1	#NULL!	2	#NULL!	#NULL!	2	#NULL!	#NULL!	1	1	#NULL!	2
486	1	2	20	10	3	1	2	0	9.5	92	2	1	1	1	4	1	1	0	1	4	1	1	2	1	5	6000	5	6000	2	2	2	4	240734	240734	1	2	1	1	6	1	2	5	1	1	2	1	1	6	2
487	1	1	20	10	3	2	3	0	15	110	2	1	1	1	3	2	1	0	1	6	1	1	2	1	2	12500	2	12500	4	6	2	4	30/6/2559	30/6/2559	1	2	1	1	7	2	0	0	1	1	2	1	1	3	2
488	1	2	20	10	3	2	2	2	13	78	2	1	1	1	4	2	1	0	1	4	1	1	2	1	4	6000	4	6000	3	1	2	4	27/6/2559	28/6/2559	3	2	1	2	6	2	0	0	1	1	2	1	2	5	2
489	1	1	20	10	3	1	3	9	15	101	2	1	1	1	4	2	1	0	1	5	1	1	2	1	3	7000	3	8000	3	4	2	4	27/6/2559	28/6/2559	2	2	1	2	4	2	0	0	1	1	4	2	0	0	2
490	1	3	20	10	3	1	2	3	12	87	2	1	1	1	4	2	1	0	1	4	1	1	2	1	4	8000	4	8000	3	4	2	4	25/6/2559	28/6/2559	4	2	1	2	6	2	0	0	1	1	3	1	2	6	2
491	1	2	20	10	3	2	2	7	13	91	2	1	1	1	4	1	1	0	1	4	1	1	2	1	4	15000	4	7000	2	4	2	4	25/6/2559	27/6/2559	3	2	1	1	7	1	1	7	1	1	3	1	1	6	2
492	1	2	29	10	3	2	2	2	12	65	1	1	1	1	2	2	1	0	1	6	2	1	2	1	2	12000	2	12000	2	6	2	4	25/6/2559	26/6/2559	2	2	1	1	7	2	0	0	1	1	4	1	1	4	2
493	1	2	20	10	3	1	2	10	14.5	98	2	1	1	1	4	2	1	0	1	4	1	1	2	1	4	7500	4	7500	3	2	2	4	240884	240976	1	2	1	3	4	1	3	4	1	1	1	1	3	4	2
494	1	2	29	10	3	2	2	3	11	80	1	1	1	1	4	2	1	0	1	3	1	1	2	1	3	10000	3	10000	2	4	2	4	240915	240915	1	2	1	1	7	1	2	6	1	1	1	1	1	4	2
495	1	2	20	10	3	1	4	1	13	95	2	1	1	1	4	2	1	0	1	3	1	1	2	1	3	15000	3	15000	2	2	2	4	240855	240916	1	2	1	1	7	1	1	7	1	1	2	1	1	5	2
496	1	2	30	10	3	2	0	10	8	71	1	2	1	1	3	1	1	0	1	4	1	1	2	1	4	5000	4	5000	2	3	2	4	240915	240946	1	2	1	1	6	1	1	6	1	1	1	1	1	2	2
497	1	2	30	10	3	1	2	10	13.5	94	2	1	1	1	4	2	1	0	1	5	1	1	2	1	4	15000	1	0	2	4	2	1	240915	241007	1	2	1	1	3	2	0	0	2	0	0	1	1	2	2
498	1	3	17	9	3	2	2	4	13	87	2	2	1	1	4	2	1	0	1	10	2	1	2	1	4	5000	4	5000	4	5	2	4	240884	240884	1	2	1	1	5	2	0	0	1	1	2	1	1	5	2
499	1	2	21	9	3	2	3	11	13	98	2	1	1	1	4	1	1	0	1	4	1	1	2	1	4	9000	6	9000	2	4	2	4	240793	240854	1	2	1	1	7	1	1	7	1	1	2	1	1	5	2
500	2	2	17	9	3	1	3	11	13	95	1	1	1	1	3	1	1	0	1	4	2	1	2	1	4	5000	6	5000	3	1	2	4	241007	241007	1	1	1	1	5	1	1	7	2	0	0	1	1	7	2
501	1	2	17	9	3	1	5	7	18	110	2	1	1	1	1	3	1	0	1	6	1	1	2	1	3	25000	3	25000	3	1	2	4	241037	241037	1	2	1	1	4	2	0	0	2	0	0	1	1	6	2
502	1	2	31	12	1	2	2	9	14.5	97	2	1	1	2	2	2	1	0	1	4	1	1	4	1	1	888	4	9000	3	2	2	2	241007	241037	1	2	1	2	6	2	0	0	1	1	1	1	1	6	2
503	1	888	31	888	1	2	2	0	10	888	2	1	1	1	4	2	1	0	1	#NULL!	#NULL!	1	2	1	1	888	1	888	2	1	2	4	888	888	#NULL!	#NULL!	#NULL!	#NULL!	#NULL!	#NULL!	#NULL!	#NULL!	#NULL!	#NULL!	#NULL!	#NULL!	#NULL!	#NULL!	#NULL!
504	1	888	32	12	1	2	1	0	888	888	2	1	1	1	4	2	1	0	1	#NULL!	#NULL!	1	2	1	1	888	1	888	2	1	2	4	888	888	#NULL!	#NULL!	#NULL!	#NULL!	#NULL!	#NULL!	#NULL!	#NULL!	#NULL!	#NULL!	#NULL!	#NULL!	#NULL!	#NULL!	#NULL!
505	1	1	26	12	1	1	4	1	17	110	2	1	1	1	4	2	1	0	1	8	6	1	1	1	4	9000	1	0	1	2	2	1	240976	241007	1	2	1	1	5	1	1	5	1	5	1	1	5	1	1
506	1	2	33	13	1	1	4	6	16	111	2	1	1	1	4	2	1	0	1	#NULL!	#NULL!	1	2	1	1	888	1	888	2	1	2	4	241007	23/1/2559	2	#NULL!	#NULL!	#NULL!	#NULL!	#NULL!	#NULL!	#NULL!	#NULL!	#NULL!	#NULL!	#NULL!	#NULL!	#NULL!	#NULL!
507	1	1	34	13	1	1	2	8	888	888	2	1	1	1	3	2	1	0	1	3	1	1	2	1	1	888	1	888	3	1	2	4	240884	240915	2	2	1	2	#NULL!	2	#NULL!	#NULL!	2	#NULL!	#NULL!	1	1	#NULL!	2
508	1	2	34	13	1	1	3	16	85	1	1	1	1	1	4	2	1	0	1	3	1	1	2	1	3	10000	3	10000	2	2	2	4	241007	241037	1	2	1	1	6	2	0	0	2	0	0	1	1	6	2
509	1	1	35	5	1	1	2	0	10	83	2	1	1	1	4	3	1	0	1	3	1	1	2	2	4	10000	4	10000	2	2	2	4	240703	240734	1	2	1	2	6	2	0	0	2	0	0	1	2	4	2
510	1	888	36	888	888	1	888	888	888	888	2	1	1	1	4	2	1	0	1	#NULL!	#NULL!	1	2	1	1	888	1	888	2	1	2	4	888	888	#NULL!	#NULL!	#NULL!	#NULL!	#NULL!	#NULL!	#NULL!	#NULL!	#NULL!	#NULL!	#NULL!	#NULL!	#NULL!	#NULL!	#NULL!
511	1	2	36	11	3	1	1	7	8	73	2	2	1	1	3	1	1	0	1	#NULL!	#NULL!	1	2	1	1	888	1	888	2	1	2	4	888	888	#NULL!	#NULL!	#NULL!	#NULL!	#NULL!	#NULL!	#NULL!	#NULL!	#NULL!	#NULL!	#NULL!	#NULL!	#NULL!	#NULL!	#NULL!
512	1	2	36	11	3	1	1	7	8	73	2	2	1	1	3	1	1	0	1	#NULL!	#NULL!	1	2	1	1	888	1	888	2	1	2	4	888	888	#NULL!	#NULL!	#NULL!	#NULL!	#NULL!	#NULL!	#NULL!	#NULL!	#NULL!	#NULL!	#NULL!	#NULL!	#NULL!	#NULL!	#NULL!
513	1	3	13	6	1	2	5	8	35	122	2	1	1	1	4	3	1	0	1	5	2	1	1	1	4	9000	4	9000	2	4	2	4	240823	241037	1	2	1	1	6	2	0	0	2	0	0	2	0	0	2
514	1	2	37	6	1	1	5	10	20	110	2	1	1	1	4	3	1	0	1	5	2	1	2	1	5	60000	2	25000	3	6	2	4	19/7/2559	21/7/2559	3	2	1	1	7	1	1	7	1	1	1	1	1	3	2
515	1	2	37	6	1	1	2	6	15	90	2	1	1	1	4	2	1	0	1	5	2	1	2	1	5	60000	2	25000	3	6	2	4	16/7/2559	21/7/2559	6	2	1	1	7	1	1	7	1	1	1	1	1	3	2
516	1	2	29	10	3	2	1	2	8.8	72	1	2	1	1	4	1	1	0	1	3	1	1	2	1	4	5000	1	0	4	4	2	4	241037	23/7/2559	2	2	2	0	0	1	1	7	1	1	4	1	3	3	2
517	1	3	30	10	3	2	2	4	18.5	85	2	1	1	1	2	2	1	0	1	3	1	1	4	1	4	8000	4	8000	3	4	2	4	18/7/2559	19/7/2559	2	2	1	1	6	2	0	0	1	1	2	1	1	5	2
518	1	2	20	10	3	2	1	1	8	90	1	2	1	1	2	1	1	0	1	5	1	1	2	1	5	20000	5	20000	4	4	2	4	20/7/2559	21/7/2559	2	2	1	1	7	1	1	7	1	1	3	2	0	0	2
519	1	3	30	10	3	2	2	0	11	78	1	1	1	1	3	2	1	0	1	3	1	1	3	1	1	0	2	20000	3	2	2	4	22/7/2559	22/7/2559	1	2	1	1	7	2	0	0	2	0	0	1	1	2	2
520	1	2	30	10	3	2	1	4	9	80	2	2	1	1	2	1	1	0	1	3	1	1	2	1	4	7000	4	7000	3	2	2	4	22/7/2559	22/7/2559	1	2	1	1	6	1	1	6	1	1	3	1	1	4	2
521	1	2	30	10	3	1	2	11	19	89	2	1	1	1	2	2	1	0	1	4	1	1	2	1	4	3000	4	3000	2	3	2	4	25/7/2559	25/7/2559	1	2	1	1	7	1	1	7	1	1	1	1	1	2	2
522	1	2	30	10	3	2	1	4	10	73	2	2	1	1	4	1	1	0	1	3	1	1	2	1	4	5000	6	4000	2	4	2	1	24/7/2559	25/7/2559	2	2	1	1	7	2	0	0	1	1	1	1	1	3	2
523	1	2	30	10	3	1	2	7	22	95	2	1	1	1	2	2	1	0	1	5	1	1	2	1	4	15000	4	15000	3	2	2	4	24/7/2559	25/7/2559	2	2	1	1	6	1	1	6	1	1	2	1	2	2	2
524	1	2	23	11	3	1	1	9	12	84	2	2	1	1	4	1	1	0	1	#NULL!	#NULL!	1	2	1	1	888	1	888	2	1	2	4	888	888	#NULL!	#NULL!	#NULL!	#NULL!	#NULL!	#NULL!	#NULL!	#NULL!	#NULL!	#NULL!	#NULL!	#NULL!	#NULL!	#NULL!	#NULL!
525	1	3	38	14	3	2	2	7	13.6	74	1	1	1	1	4	2	1	0	1	4	1	1	2	1	6	12000	6	6000	2	5	2	4	15/7/2559	21/7/2559	6	2	1	2	6	2	0	0	1	1	3	1	2	5	2
526	1	2	39	14	3	1	1	9	14.5	88	1	2	1	1	4	1	1	0	1	2	1	1	2	1	4	12000	1	0	2	3	2	2	241037	15/7/2559	6	2	1	1	7	2	0	0	1	1	4	1	1	3	1
527	1	2	40	12	1	1	2	2	14	95	2	1	1	1	3	2	1	0	1	6	1	1	2	1	4	10000	4	9000	3	3	2	4	19/7/2559	21/7/2559	3	2	1	2	7	1	2	7	2	0	0	1	2	3	2
528	1	2	41	12	1	2	2	5	10	91	2	1	1	1	4	2	1	0	1	4	1	1	2	1	4	10000	6	10000	2	5	2	4	26/7/2559	29/7/2559	4	2	2	0	0	2	0	0	2	0	0	1	1	7	2
529	1	2	29	10	3	1	1	11	11	70	2	1	1	1	4	2	1	0	1	5	1	1	2	1	3	8000	3	8000	4	4	2	4	28/7/2559	28/7/2559	1	2	#NULL!	#NULL!	#NULL!	#NULL!	#NULL!	#NULL!	#NULL!	#NULL!	#NULL!	#NULL!	#NULL!	#NULL!	#NULL!
530	1	3	29	10	3	2	2	11	14	88	1	1	1	1	3	2	1	0	1	3	1	1	2	1	4	8000	4	8000	3	2	2	4	26/7/2559	28/7/2559	3	2	1	1	7	2	0	0	2	0	0	1	1	4	2
531	1	2	29	10	3	2	1	4	9	66	1	2	1	1	2	1	1	0	1	5	1	2	2	1	4	3000	4	4000	3	2	2	2	30/7/2559	31/7/2559	2	2	2	0	0	2	0	0	1	1	3	1	4	4	2
532	1	2	30	10	3	1	2	3	11	83	2	1	1	1	4	2	1	0	1	3	1	1	2	1	3	10000	1	0	4	2	2	4	31/7/2559	310735	1	2	1	1	6	2	0	0	1	2	2	1	1	4	1
533	1	2	42	15	1	1	0	9	10	65	2	2	1	1	4	1	1	0	1	7	1	1	2	1	3	10000	3	10000	4	6	2	1	30/7/2559	300704	1	2	1	1	7	2	0	0	1	1	1	1	1	4	2
534	1	1	42	15	1	2	1	9	10	77	2	2	1	1	4	1	1	0	1	13	2	1	2	1	3	3000	3	3000	4	2	2	4	30/7/2559	30/7/2559	1	2	2	0	0	1	1	7	1	1	4	1	1	3	2
535	1	3	43	11	3	1	2	10	11	92	1	1	1	1	4	2	1	0	1	3	1	1	2	1	4	10000	1	0	2	4	2	1	240704	240704	1	2	1	1	4	2	0	0	1	1	1	1	1	4	2
536	1	3	30	10	3	2	1	9	9	78	2	2	1	1	4	1	1	0	1	3	1	1	4	1	3	10000	3	10000	4	4	2	4	240824	240855	1	2	1	2	6	1	2	6	1	1	1	1	2	2	2
537	1	3	29	10	3	2	3	7	15.5	95	1	2	1	1	2	1	1	0	1	3	1	1	2	1	2	16000	4	18000	3	1	2	4	240855	240885	1	2	1	2	6	2	0	0	1	1	1	1	2	4	2
538	1	1	44	16	1	1	4	6	30	110	1	1	1	1	4	3	2	1	1	6	1	1	2	1	3	30000	3	30000	4	3	2	4	240704	240763	1	2	1	1	7	2	0	0	1	1	1	1	1	4	2
539	1	3	44	16	1	2	5	10	15	104	2	1	1	1	2	3	1	0	1	4	1	1	2	1	3	40000	3	40000	3	2	2	3	240704	240763	1	2	1	1	7	1	1	7	2	0	0	1	1	4	2
540	1	2	44	16	1	1	3	5	15	98	1	1	1	1	4	3	1	0	1	3	1	1	2	1	3	20000	3	20000	3	1	2	3	240704	240763	1	2	1	1	7	1	1	7	1	1	2	1	1	4	2
541	1	3	44	16	1	1	1	1	8	61	2	2	1	2	4	1	1	0	1	8	2	1	4	2	3	100000	3	100000	2	1	2	2	29/7/2559	290704	1	2	1	3	4	1	3	2	1	1	1	1	3	5	2
542	1	1	44	16	1	1	0	10	8.3	73	2	2	1	1	4	1	1	0	1	3	1	1	2	1	3	100000	3	100000	4	1	2	4	240735	240794	1	2	1	1	7	1	1	7	2	0	0	1	1	4	2
543	1	2	44	16	1	2	4	5	20	106	2	1	1	2	4	3	1	0	1	4	1	1	2	1	4	4000	1	0	4	2	2	4	30/7/2559	300704	1	2	1	3	5	2	0	0	1	3	2	1	1	5	1
544	1	1	44	16	1	2	1	4	9.3	70	2	2	1	1	1	1	1	0	1	9	3	1	2	1	3	20000	3	20000	4	5	2	4	240855	240885	1	3	1	1	6	1	1	6	1	1	3	1	1	5	2
545	1	2	44	16	1	2	2	6	10	90	2	1	1	1	3	2	1	0	1	5	1	1	2	1	3	25000	3	25000	2	2	2	4	240855	240885	1	3	1	1	7	1	1	7	1	1	3	1	1	3	2
546	1	2	45	15	1	1	1	7	10.5	80	1	1	1	1	4	2	1	0	1	7	2	1	2	1	5	50000	5	50000	2	4	2	2	240885	240946	1	2	1	1	6	2	0	0	1	1	2	1	2	4	2
547	1	2	2	1	1	2	3	10	13.7	75	2	1	1	1	4	2	1	0	1	4	1	1	2	1	4	10000	1	0	2	1	2	2	240794	240824	1	2	1	1	4	2	0	0	1	1	4	1	2	4	1
548	1	2	5	1	1	2	2	7	13	88	1	1	1	1	4	2	1	0	1	8	3	1	2	1	1	0	4	4000	2	1	2	2	240824	240916	1	2	1	1	7	1	1	7	2	0	0	2	0	0	2
549	1	2	13	6	1	1	8	4	27	135	1	1	1	1	4	3	1	0	1	4	1	1	2	1	2	25000	2	25000	4	6	2	4	240824	240824	1	2	2	0	0	2	0	0	1	1	3	1	1	4	1
550	1	2	46	5	1	1	4	5	15	108	1	1	1	1	1	2	2	2	1	3	1	1	4	1	1	0	4	8000	3	1	2	2	14/8/2559	15/8/2559	3	2	2	0	0	2	0	0	1	1	2	1	1	4	2
551	1	3	46	5	1	1	3	7	15	95	1	1	1	1	4	2	1	0	1	3	1	1	4	1	1	0	4	10000	2	2	2	2	13/8/2559	15/8/2559	3	2	1	1	6	2	0	0	1	1	2	1	1	6	2
552	1	1	42	15	1	1	1	2	8	70	2	2	1	2	3	1	1	0	1	5	2	1	2	1	3	5000	3	5000	2	3	2	2	240977	241038	1	2	1	1	5	1	1	5	1	1	6	1	1	3	2
553	1	2	5	1	1	1	1	8	16.5	85	2	2	1	1	2	2	1	0	1	3	1	1	2	1	4	16000	4	9000	1	3	2	1	14/8/2559	15/8/2559	2	2	1	1	6	2	0	0	2	0	0	1	1	6	1
554	1	2	30	10	3	1	2	0	11	82	2	1	1	1	4	2	1	0	1	3	1	1	2	1	3	5000	3	2000	4	3	2	4	16/8/2559	16/8/2559	1	2	1	1	4	2	0	0	1	1	2	1	1	2	2
555	1	2	30	10	3	1	1	1	10	72	2	1	1	1	4	1	1	0	1	4	1	1	2	1	3	5000	3	5000	2	1	2	4	14/8/2559	15/8/2559	2	2	1	1	3	2	0	0	1	1	2	1	1	2	2
556	1	2	30	10	3	1	1	5	9	56	2	2	1	1	4	1	1	0	1	5	3	1	2	1	3	8000	3	8000	2	3	2	1	241038	241038	1	2	1	1	4	1	1	3	1	1	3	1	1	3	1
557	1	1	30	10	3	1	1	4	11	58	2	1	1	1	4	1	1	0	1	4	1	1	2	1	3	9000	3	9000	3	1	2	1	241038	241038	1	2	#NULL!	#NULL!	#NULL!	#NULL!	#NULL!	#NULL!	#NULL!	#NULL!	#NULL!	#NULL!	#NULL!	#NULL!	#NULL!
558	1	3	9	4	1	2	2	8	11	84.8	1	1	1	1	4	2	1	0	1	5	1	1	2	1	4	10000	4	10000	2	4	2	4	240947	240977	1	2	1	1	3	2	0	0	2	0	0	1	1	3	2
559	1	2	47	6	1	1	2	0	13.5	73	1	2	1	1	1	1	1	0	1	4	1	1	2	1	4	10000	4	10000	4	2	2	4	19/8/2559	23/8/2559	5	2	1	1	7	2	0	0	1	1	1	1	1	5	2
560	1	1	42	15	1	1	1	6	11	53	2	2	1	1	3	1	1	0	1	8	1	1	2	2	5	5000	5	5000	4	5	2	4	22/8/2559	23/8/2559	2	2	1	1	7	1	1	7	1	1	1	1	1	3	2
561	1	3	48	8	3	1	1	6	9.8	79	2	1	1	1	4	1	2	2	2	5	1	1	2	1	4	6500	1	0	3	1	2	1	21/8/2559	22/8/2559	2	2	1	2	4	2	0	0	1	2	1	1	1	3	1
562	1	3	49	12	1	1	0	11	10	90	1	2	1	1	3	1	1	0	1	6	1	1	2	1	5	7500	5	7500	2	1	2	4	22/8/2559	24/8/2559	3	2	1	2	5	2	0	0	1	1	3	1	2	6	2
563	1	3	30	10	3	1	0	9	9	62	2	1	1	1	4	1	1	0	1	6	1	1	2	1	4	9000	1	0	2	3	2	1	18/8/2559	19/8/2559	2	2	1	1	7	2	0	0	1	1	3	1	1	4	2
564	1	3	5	1	1	1	3	0	15	94	1	2	1	1	4	2	1	0	1	4	1	1	2	1	6	6000	4	8000	2	1	2	1	21/8/2559	22/8/2559	3	2	2	0	0	2	0	0	1	1	3	1	1	6	2
565	1	1	13	6	1	1	0	7	7.5	65	2	2	1	1	3	1	1	0	1	3	1	1	2	1	3	10000	3	10000	2	1	2	1	23/8/2559	24/8/2559	2	2	1	1	6	2	0	0	1	1	2	1	1	5	2
566	1	3	37	6	1	2	1	4	9	72	2	2	1	1	3	1	1	0	1	4	1	1	2	1	3	10000	3	10000	3	1	2	2	30/8/2559	31/8/2559	2	2	1	2	4	1	2	4	2	0	0	1	1	5	2
567	1	2	37	6	1	1	4	7	25	110	2	1	1	1	4	2	2	5	1	3	1	1	2	1	4	20000	5	8000	2	2	2	4	240856	240856	1	2	1	2	5	2	0	0	1	1	1	1	1	4	2
568	1	2	50	11	3	1	2	7	10.5	88	2	1	1	1	2	2	1	0	1	7	1	1	2	1	4	10000	4	10000	4	3	2	4	27/8/2559	29/8/2559	3	2	1	1	7	2	0	0	1	1	1	1	1	4	1
569	1	3	5	1	1	2	2	8	13	110	1	1	1	1	4	2	1	0	1	10	2	2	1	1	4	5000	4	5000	2	1	2	2	241039	241039	1	2	1	1	5	1	1	5	1	1	1	1	1	4	1
570	1	3	5	1	1	2	0	5	7	55	1	2	1	1	3	1	1	0	1	10	2	1	2	1	4	9000	4	5000	2	1	2	1	240978	241039	1	2	1	2	2	1	1	3	1	1	2	1	1	3	1
571	1	2	5	1	1	2	6	0	42	120	1	1	1	1	3	1	1	0	1	10	2	1	2	1	4	9000	4	5000	2	1	2	1	241039	24/9/2559	1	2	1	1	5	1	1	5	2	0	0	1	1	4	2
572	1	3	5	1	1	1	6	0	21	12	2	2	1	1	4	1	1	0	1	7	1	1	2	1	5	8000	5	8000	2	1	2	1	23/9/2559	27/9/2559	3	2	1	4	4	1	4	4	1	1	3	1	5	3	1
573	1	3	5	1	1	2	3	0	15	98	1	2	1	1	4	1	1	0	1	7	1	2	2	1	5	8000	5	8000	2	1	2	1	25/9/2559	27/9/2559	3	2	1	4	4	1	4	4	1	1	3	1	3	3	2
574	1	3	5	1	1	2	8	0	25	133	1	1	1	1	4	1	1	0	1	7	1	1	2	1	5	8000	5	8000	2	2	2	1	22/9/2559	27/9/2559	6	2	1	5	3	1	5	3	1	1	4	1	5	3	2
575	1	2	51	1	1	1	2	5	14	84	2	1	1	1	3	2	1	0	1	2	1	2	2	2	4	15000	2	20740	2	6	2	4	240765	240796	1	2	2	0	0	2	0	0	1	1	5	1	1	5	1
576	1	3	51	1	1	1	2	10	14	85	2	1	1	1	2	2	1	0	1	5	1	2	4	1	4	10000	4	10000	2	5	2	4	240706	240826	1	1	2	0	0	2	0	0	2	0	0	1	1	3	2
577	1	2	52	5	1	1	2	11	14	93	2	2	1	1	4	2	1	0	1	6	1	1	2	1	6	10000	6	7200	3	1	2	4	240737	240765	1	2	1	2	6	1	2	6	1	1	3	1	2	5	1
578	1	1	34	13	1	1	3	7	17	110	2	1	1	1	2	2	1	0	1	3	1	1	2	1	5	15000	5	15000	3	2	2	3	240857	240887	1	2	1	1	5	2	0	0	1	2	2	1	2	3	2
579	1	1	42	12	1	1	0	11	6	60	2	2	2	1	4	1	1	0	1	15	5	1	2	1	3	3000	3	3000	1	3	2	4	240796	240857	1	2	1	1	4	2	0	0	1	1	2	1	1	3	2
580	1	3	53	12	1	2	3	1	15	90	2	1	1	1	1	2	1	0	1	6	2	1	2	1	4	8000	4	10000	3	2	2	2	240707	240707	1	2	1	1	7	2	0	0	2	0	0	1	1	7	1
581	1	3	53	12	1	1	3	0	12	96	2	1	1	1	3	2	1	0	1	6	1	1	2	1	4	12000	4	12000	2	3	2	1	241001	241001	1	2	1	1	7	2	0	0	2	0	0	1	1	4	2
582	1	3	53	12	1	1	3	8	19	120	2	1	2	2	3	2	1	0	1	4	1	2	2	1	3	10000	4	6000	3	2	2	3	241001	241001	1	2	1	1	2	2	0	0	2	0	0	1	1	4	2
583	1	3	5	5	1	1	2	9	12	89	1	2	1	1	4	1	1	0	1	5	1	1	2	1	3	15000	5	15000	2	4	2	4	240987	240987	1	2	2	0	0	1	1	5	1	1	2	1	3	4	2
584	1	3	53	12	1	1	2	9	14	888	2	1	1	1	3	2	1	0	1	4	1	1	4	1	4	1000	4	12000	3	1	2	3	241006	241007	1	2	1	1	2	2	0	0	1	1	1	1	1	2	2
585	1	2	53	12	1	2	2	8	12	49	2	1	1	1	4	2	1	0	1	6	1	1	4	1	1	888	1	888	3	1	2	3	241007	241007	1	2	2	0	0	2	0	0	2	0	0	1	1	6	2
586	1	1	53	12	1	1	4	1	14	98	2	1	1	1	4	2	1	0	1	4	1	1	2	1	4	888	4	12000	3	2	2	4	6/11/1559	61007	1	2	1	1	6	2	0	0	2	0	0	1	1	6	2
587	1	2	53	12	1	2	3	2	11	94	2	1	1	1	4	2	1	0	1	4	1	1	4	1	1	888	1	888	2	2	2	3	241006	241007	2	2	1	1	9	2	0	0	1	1	1	1	1	7	2
588	1	2	53	12	1	1	3	11	12	92	2	1	1	1	4	2	1	0	1	4	1	1	4	1	1	888	4	6000	2	2	2	2	241007	241007	1	2	1	1	2	2	0	0	2	0	0	1	1	2	2
589	1	2	53	12	1	1	3	7	13	93	2	1	1	1	4	2	1	0	1	5	1	1	2	1	4	20000	4	20000	2	4	2	4	241007	241008	2	2	1	1	7	1	1	7	1	1	1	1	1	7	2
590	1	3	53	12	1	2	3	0	11	70	2	1	1	1	2	2	2	1	1	3	1	1	2	1	4	18000	4	18000	3	2	2	3	241007	241007	1	2	2	0	0	2	0	0	1	1	1	2	0	0	1
591	1	2	53	12	1	1	3	4	13	96	2	1	1	1	4	2	1	0	1	4	1	1	2	1	4	8000	4	8000	2	2	2	4	241007	241007	1	2	1	1	5	2	0	0	2	0	0	1	1	3	2
592	1	2	53	12	1	2	2	0	9.5	87	2	1	1	1	4	1	1	0	1	4	1	1	2	1	4	888	1	888	2	5	2	1	241008	241008	1	2	1	1	1	2	0	0	2	0	0	1	1	1	2
593	1	2	53	12	1	2	3	0	11	89	2	1	1	1	4	2	1	0	1	8	2	1	2	1	4	888	4	888	2	3	2	4	241008	241008	1	1	1	1	1	2	0	0	2	0	0	1	1	1	2
594	1	3	53	12	1	1	3	0	12	89	2	1	1	1	4	2	1	0	1	3	1	1	4	1	1	888	1	888	3	3	2	3	241006	241007	2	2	1	1	7	2	0	0	2	0	0	1	1	6	2
595	1	2	54	2	1	1	1	3	8	75	2	2	1	1	4	1	1	0	1	3	0	1	2	1	3	4000	4	7000	3	1	2	3	241001	241007	5	2	1	3	5	2	0	0	1	1	3	1	3	5	2
596	1	3	1	1	1	1	1	2	9	80	1	2	1	1	4	1	1	0	1	4	1	1	2	1	4	8000	1	888	2	1	2	1	241005	241007	2	2	1	1	7	2	0	0	2	0	0	1	1	7	2
597	1	1	1	1	1	2	2	2	11	87	1	2	1	1	4	1	1	0	1	3	1	1	2	1	4	25000	1	888	2	1	2	1	241003	241008	3	2	1	1	7	2	0	0	2	0	0	1	1	7	2
598	1	3	55	12	1	1	3	2	17	70	2	2	1	1	2	3	1	0	1	3	1	1	2	1	4	888	4	888	3	2	2	4	241009	241009	1	2	1	#NULL!	#NULL!	2	0	0	1	#NULL!	#NULL!	1	#NULL!	#NULL!	2
599	1	2	56	4	1	1	1	4	9	78	2	2	1	1	3	1	1	0	1	5	1	1	2	1	4	9000	1	888	2	1	2	4	241014	241015	2	2	1	1	7	1	1	7	1	1	1	1	2	2	2
600	1	1	32	12	1	1	2	0	11	100	1	1	1	1	4	1	1	0	1	4	2	1	2	1	4	888	4	888	4	1	2	1	241011	241011	1	2	1	1	3	2	0	0	1	1	3	1	1	5	2
601	1	2	40	12	1	1	4	0	25	114	2	1	1	1	3	3	1	0	1	5	1	1	2	1	5	20000	4	15000	2	6	2	4	241015	241015	1	2	1	1	3	1	1	4	1	1	2	1	1	4	2
602	1	2	33	12	1	1	5	0	14	120	2	1	1	1	4	3	1	0	1	5	1	1	2	1	3	13000	3	13000	2	3	2	4	241015	241015	1	2	1	2	4	2	0	0	1	2	3	1	1	3	2
603	1	1	57	5	1	2	4	6	19	103	1	1	1	1	3	2	1	0	1	8	0	2	2	1	3	888	3	888	1	2	2	1	241029	241029	1	2	1	1	1	2	0	0	2	0	0	1	1	1	2
604	1	3	57	5	1	1	7	9	25	127	1	1	1	1	4	3	2	2	2	4	0	2	2	1	4	888	5	888	2	3	2	1	241029	241029	1	2	1	2	1	2	0	0	1	1	1	1	2	1	2
605	1	3	57	5	1	1	2	6	14	92	1	1	1	1	3	2	1	0	1	4	1	1	4	1	4	888	1	888	3	2	2	1	241021	241021	1	2	1	1	1	2	0	0	2	0	0	1	1	1	2
606	1	2	5	1	1	1	8	9	20	123	1	1	1	1	4	3	2	1	1	5	1	1	2	1	5	15000	4	22000	2	6	2	4	241024	241025	2	2	1	2	4	1	2	4	2	0	0	1	1	6	2
607	1	1	5	1	1	2	1	2	8	71	1	2	1	1	4	1	1	0	1	3	1	1	2	1	4	9000	1	888	2	1	2	1	241015	241017	3	2	1	1	7	2	0	0	2	0	0	2	0	0	2
608	1	2	1	1	1	2	4	0	17	120	1	1	1	1	2	1	1	0	1	8	1	1	2	1	5	15000	5	15000	2	1	2	1	241013	241013	1	3	1	1	3	2	0	0	2	0	0	1	1	4	2
609	1	2	1	1	1	1	1	0	10	64	1	1	1	1	4	1	2	1	1	5	1	1	2	1	4	10000	5	30000	2	6	2	4	241008	241011	4	2	1	1	5	2	0	0	1	1	5	1	2	5	2
610	1	3	5	1	1	2	6	9	19	100	1	1	1	1	4	3	1	0	1	4	1	1	2	1	4	30000	6	12000	2	4	2	1	241015	241015	1	2	1	1	4	1	1	4	1	1	3	1	1	5	1
611	1	1	58	1	1	1	3	6	25	105	2	1	1	1	2	2	1	0	1	9	3	1	2	1	3	1000	3	1000	2	2	2	1	241015	241016	2	2	2	0	0	2	0	0	2	0	0	2	0	0	2
612	1	1	58	1	1	1	3	6	16	100	2	1	1	1	2	2	1	0	1	9	3	1	2	1	3	1000	3	1000	2	2	2	1	241015	241016	2	2	1	#NULL!	#NULL!	2	0	0	1	#NULL!	#NULL!	1	#NULL!	#NULL!	2
613	1	3	59	5	1	1	1	2	8	74	1	2	1	1	3	1	1	0	1	3	0	1	2	1	1	888	4	15000	2	2	2	4	241030	241030	1	2	2	0	0	2	0	0	2	0	0	1	1	4	2
614	1	3	59	5	1	1	1	6	11	78	2	1	1	1	3	2	1	0	1	7	3	1	1	1	3	3000	4	10000	3	2	2	1	241036	241036	1	2	1	1	3	2	0	0	1	1	2	1	1	3	2
615	1	2	1	1	1	1	2	10	13	100	1	1	1	1	4	2	1	0	1	6	1	1	2	1	5	12000	6	10000	2	5	2	1	241034	241037	4	2	1	1	4	2	0	0	1	1	2	1	1	4	2
616	1	1	57	5	1	2	5	1	17	108	1	1	1	1	4	3	1	0	1	5	0	1	2	1	4	12000	4	12000	2	2	2	1	241028	241030	3	2	1	1	2	2	0	0	1	1	1	1	1	3	2
617	1	3	46	5	1	1	3	3	13	95	1	1	1	1	2	2	1	0	1	4	1	2	2	1	4	15000	1	888	2	4	2	1	241045	241045	1	2	1	1	3	2	0	0	1	1	1	1	1	3	2
618	1	3	46	5	1	2	3	1	12	90	2	1	1	1	3	3	1	0	2	3	0	1	2	1	4	888	4	888	3	1	2	4	241042	241042	1	2	1	2	3	2	0	0	2	0	0	1	2	4	2
619	1	1	59	5	1	1	2	6	14	93	2	2	1	1	2	1	1	0	1	5	1	1	2	1	3	12000	3	12000	3	2	2	4	241044	231472	2	2	1	1	4	2	0	0	2	0	0	1	1	5	2
620	1	3	60	5	1	2	3	4	13	92	2	1	1	1	2	2	1	0	1	7	1	2	2	1	4	12000	4	12000	3	2	2	4	241049	241049	1	2	2	0	0	2	0	0	1	1	2	1	1	3	2
621	1	1	60	5	1	1	4	5	17	107	2	1	1	1	2	2	1	0	1	4	1	1	2	1	4	15000	4	15000	3	5	2	4	241049	241049	1	2	1	1	3	2	0	0	1	1	1	1	1	3	2
622	1	2	60	5	1	2	4	2	18	102	2	1	1	1	4	2	1	0	1	3	1	1	2	1	4	10000	6	0	2	3	2	2	241050	241050	1	2	2	0	0	2	0	0	2	0	0	2	0	0	2
623	1	1	60	5	1	1	3	7	11	88	2	1	1	1	1	2	1	0	2	5	1	2	2	1	4	6000	4	5000	2	1	2	4	241050	241032	1	2	1	1	6	2	0	0	1	1	1	1	1	4	2
624	1	2	60	5	1	1	9	0	26	134	2	1	1	1	4	3	1	0	1	4	0	1	2	1	4	9000	4	8000	2	5	2	4	241051	241052	3	2	1	2	3	2	0	0	1	1	5	1	2	6	1
625	1	2	1	1	1	2	0	11	9	70	1	2	1	1	4	1	1	0	1	4	1	1	2	1	4	7500	1	0	2	1	2	1	241047	241049	2	2	1	1	5	1	1	7	1	1	3	1	1	5	2
626	1	1	46	5	1	2	2	2	12	94	1	1	1	1	3	2	1	0	1	6	2	1	2	1	5	888	5	888	2	5	1	4	241053	241053	1	2	1	1	1	2	0	0	2	0	0	1	1	1	2
627	1	2	46	5	1	1	2	6	13	84	1	1	1	1	3	2	1	0	1	6	1	1	2	1	4	888	4	888	2	3	2	4	241053	241053	1	2	2	0	0	2	0	0	1	#NULL!	#NULL!	1	#NULL!	#NULL!	2
628	1	3	46	5	1	1	2	3	11	85	1	1	1	1	3	2	1	0	1	7	2	2	2	1	5	888	5	888	3	4	2	4	241051	241053	1	2	1	3	1	2	0	0	1	3	1	1	2	1	2
629	1	3	46	5	1	1	2	4	10	92	1	1	1	1	3	2	1	0	1	4	1	2	4	1	4	888	4	888	2	3	2	2	241053	241053	1	2	1	1	1	2	0	0	1	1	1	1	1	1	2
630	1	2	46	5	1	2	2	6	10	90	1	1	1	1	3	2	1	0	1	6	1	1	2	1	4	888	4	888	2	3	2	4	241053	241053	1	2	2	0	0	2	0	0	1	#NULL!	#NULL!	1	#NULL!	#NULL!	2
631	1	3	52	5	1	1	2	10	14	91	2	1	1	1	3	2	1	0	1	3	0	1	4	1	1	888	4	888	3	2	2	4	241066	241066	1	2	1	1	1	1	#NULL!	#NULL!	2	0	0	1	#NULL!	#NULL!	2
632	1	3	52	5	1	1	2	8	12	82	2	1	2	3	4	2	1	0	1	5	0	1	2	1	4	888	4	888	2	1	2	4	241066	241066	1	2	1	1	1	2	0	0	2	0	0	1	1	1	2
633	1	2	52	5	1	1	4	0	18	110	2	1	1	1	3	1	1	0	1	5	1	1	2	1	4	888	4	888	2	5	2	2	241066	241066	1	2	1	1	5	2	0	0	1	1	5	2	0	0	2
634	1	3	52	5	1	1	2	10	16	95	2	1	1	1	3	2	1	0	1	3	0	1	4	1	1	888	4	888	3	2	2	4	241066	241066	1	2	1	1	1	1	#NULL!	#NULL!	2	0	0	1	#NULL!	#NULL!	2
635	1	3	60	5	1	1	2	11	10	90	2	1	1	1	4	2	1	0	1	6	2	1	4	1	1	888	4	5000	2	2	2	2	241060	241062	3	2	1	1	5	2	0	0	1	1	2	1	1	4	2
636	1	3	60	5	1	2	2	11	14	99	2	1	1	1	2	2	1	0	1	6	1	1	2	1	4	9000	5	6000	2	4	2	4	241064	241065	2	2	1	1	3	2	0	0	2	0	0	1	1	3	2
637	1	1	60	5	1	1	3	5	15	95	2	1	1	1	3	2	1	0	1	4	1	2	2	1	5	10000	5	10000	2	3	2	4	241064	241065	2	2	1	1	3	2	0	0	1	1	2	1	1	7	2
638	1	2	52	5	1	1	3	9	20	105	2	1	1	1	4	2	1	0	1	5	1	2	2	1	3	10000	3	888	2	4	2	1	241057	241059	3	2	1	1	7	2	0	0	1	1	4	1	1	7	2
639	1	2	1	1	1	2	3	5	10	88	1	1	1	1	4	2	1	0	1	3	1	1	2	1	4	3000	1	0	2	1	2	1	241075	241076	2	3	1	1	3	2	0	0	1	1	1	1	1	3	2
640	1	2	1	1	1	2	1	1	9	85	1	2	1	1	4	1	1	0	1	5	1	1	2	1	4	9000	1	0	2	4	2	1	241078	241081	4	3	1	#NULL!	#NULL!	1	#NULL!	#NULL!	1	#NULL!	#NULL!	1	#NULL!	#NULL!	2
641	1	2	61	1	1	1	1	11	10	77	2	1	1	1	4	1	1	0	1	5	0	1	2	1	4	8900	4	6500	2	1	2	4	241071	241071	1	3	1	1	3	2	0	0	2	0	0	1	1	2	2
642	1	2	61	1	1	1	1	7	9	72	1	2	1	1	4	1	1	0	1	12	3	1	2	2	3	3000	3	3000	2	1	2	1	241071	241071	1	2	1	1	4	2	0	0	1	1	4	1	1	2	1
643	1	1	5	1	1	2	2	10	14	90	1	2	1	1	4	1	1	0	1	5	1	1	2	1	4	7500	4	5000	2	1	2	1	241088	241089	2	2	1	1	7	2	0	0	1	1	1	1	1	3	2
644	1	2	5	1	1	1	2	2	11	65	2	1	1	1	4	2	1	0	1	4	2	1	2	1	4	3500	1	0	2	1	2	1	241058	241058	1	2	1	1	3	1	1	2	2	0	0	2	0	0	2
645	1	1	62	15	1	2	2	5	11	83	1	1	1	1	4	2	1	0	1	4	0	1	2	1	4	9000	4	888	4	3	2	4	241071	241073	3	2	1	1	3	2	0	0	1	1	3	1	1	3	2
646	1	2	20	10	3	1	3	6	12	94	1	1	1	1	2	1	1	0	1	6	2	2	1	1	4	888	5	888	3	2	1	4	241063	241063	1	2	1	1	1	1	1	1	2	0	0	1	1	1	1
647	1	3	20	10	3	1	1	5	11	65	2	2	1	1	4	1	1	0	1	3	1	1	2	1	5	50000	5	50000	3	2	2	4	241074	241074	1	2	1	#NULL!	#NULL!	2	0	0	1	#NULL!	#NULL!	1	#NULL!	#NULL!	2
648	1	3	47	6	1	1	3	6	15	98	1	1	1	1	3	2	1	0	1	4	1	2	2	1	2	6000	1	0	2	5	2	1	241084	241084	1	2	2	0	0	2	0	0	2	0	0	1	1	6	2
649	1	2	47	6	1	1	3	0	12	90	1	1	1	1	4	2	1	0	1	5	0	2	2	1	3	5000	3	7000	2	3	2	2	241082	241082	1	3	1	1	5	2	0	0	1	1	5	1	1	5	2
650	1	2	47	6	1	2	4	0	17	101	1	1	1	1	4	2	1	0	1	3	1	2	2	1	3	888	3	888	3	2	2	2	241084	241084	1	2	2	0	0	2	0	0	2	0	0	1	1	1	1
651	1	3	47	6	1	1	3	0	16	93	1	1	1	1	4	2	1	0	1	4	1	1	4	1	4	888	3	888	2	4	2	2	241080	241081	2	2	1	1	1	2	0	0	1	1	1	2	0	0	2
652	1	2	47	6	1	1	4	0	19	102	1	1	1	1	2	2	1	0	1	7	0	1	2	1	4	10000	6	0	2	2	2	1	241081	241081	1	2	1	1	3	2	0	0	1	1	3	1	1	3	2
653	1	3	47	6	1	1	3	10	14	99	1	1	1	2	4	1	1	0	1	3	1	1	2	1	4	888	4	888	3	2	2	4	241084	241084	1	1	2	0	0	2	0	0	2	0	0	1	1	1	2
654	1	2	47	6	1	2	3	9	15	888	1	1	2	1	2	1	1	0	1	4	1	1	2	1	3	4000	3	4000	3	2	2	4	241084	241084	1	2	1	1	1	2	0	0	1	1	1	2	0	0	2
655	1	3	47	6	1	2	3	0	12	888	1	1	1	1	2	2	1	0	1	5	1	1	2	1	2	20000	2	20000	3	2	2	4	241082	241084	4	2	1	1	7	2	0	0	1	1	3	1	1	7	2
656	1	2	47	6	1	1	1	11	13	85	1	1	1	1	4	2	1	0	1	4	0	1	2	1	4	6000	6	0	2	2	2	1	241082	241082	1	2	1	3	1	2	0	0	1	1	1	1	2	1	2
657	1	3	47	6	1	1	2	6	16	98	1	1	1	1	2	2	1	0	1	4	0	1	1	1	4	9000	4	888	4	3	2	2	241078	277602	1	2	1	1	1	2	0	0	1	1	3	1	1	7	2
658	1	2	47	6	1	2	2	9	11	92	1	1	1	1	4	2	1	0	1	4	0	1	2	1	4	5000	6	0	2	3	2	1	241081	241081	1	2	1	1	2	2	0	0	2	0	0	1	1	2	2
659	1	2	47	6	1	1	2	6	15	888	1	1	1	1	2	1	1	0	1	5	1	1	2	1	3	2500	3	2500	3	2	2	4	241084	241084	1	1	1	1	3	1	1	4	2	0	0	1	1	3	2
660	1	2	47	6	1	2	2	11	12	85	1	1	1	1	4	2	1	0	1	4	1	1	2	1	3	10000	3	10000	2	2	2	4	241081	241081	1	2	2	0	0	2	0	0	1	1	2	1	1	3	1
661	1	2	47	6	1	2	2	0	16	80	1	1	1	1	2	2	1	0	1	3	1	1	2	1	4	888	4	888	3	2	2	4	241081	241081	1	2	1	3	1	2	0	0	2	0	0	1	3	1	2
662	1	2	47	6	1	1	2	7	10	80	1	1	1	1	4	1	1	0	1	13	2	1	2	1	3	888	3	888	2	2	2	3	241084	241084	1	1	2	0	0	2	0	0	1	2	1	1	1	1	2
663	1	3	47	6	1	2	2	6	10	82	1	1	1	1	4	2	1	0	1	6	1	1	2	1	3	888	3	888	3	2	2	4	241084	241084	1	2	2	0	0	2	0	0	2	0	0	1	1	1	2
664	1	2	47	6	1	2	4	0	17	105	1	1	1	1	4	2	1	0	1	4	0	2	1	1	4	15000	6	0	2	6	2	1	241082	241082	1	2	1	3	1	2	0	0	2	0	0	1	2	1	2
665	1	2	47	6	1	2	3	0	13	90	1	1	1	2	4	1	1	0	1	8	1	1	2	1	3	888	3	888	3	2	2	3	241084	241084	1	1	2	0	0	2	0	0	1	1	1	2	0	0	2
666	1	3	47	6	1	2	3	0	12	90	1	1	1	3	4	1	1	0	1	3	1	1	2	1	3	888	3	888	3	2	2	3	241084	241084	1	1	2	0	0	2	0	0	2	0	0	1	1	1	2
667	1	2	47	6	1	2	2	11	11	85	1	1	1	1	2	2	1	0	1	5	1	1	2	1	6	888	4	6000	3	2	2	2	241084	241084	1	2	1	#NULL!	#NULL!	2	0	0	2	0	0	1	1	1	2
668	1	3	47	6	1	1	3	0	16	101	1	1	1	2	4	1	1	0	1	6	2	1	2	1	3	888	3	888	2	2	2	3	241084	241084	1	2	2	0	0	2	0	0	2	0	0	1	1	1	2
669	1	2	52	5	1	1	3	6	18	100	2	1	1	1	2	2	1	0	1	6	1	1	2	1	1	888	4	9000	3	2	2	3	241075	241076	2	2	1	1	7	2	0	0	2	0	0	1	1	7	2
670	1	3	52	5	1	1	2	8	15	98	2	1	1	1	2	2	1	0	1	3	1	1	2	1	4	888	4	888	3	1	1	4	241071	241073	3	2	1	3	1	2	0	0	1	1	1	1	1	1	2
671	1	1	60	5	1	1	3	10	14	100	2	1	1	1	2	2	1	0	1	4	1	1	4	1	4	9000	1	888	1	3	2	1	241085	241086	2	2	1	1	4	2	0	0	2	0	0	1	1	1	2
672	1	2	60	5	1	1	0	7	9	71	2	1	1	1	2	1	1	0	1	4	1	1	2	1	4	10000	4	10000	3	2	2	3	241083	241084	1	2	1	1	2	2	0	0	1	1	3	1	1	3	2
673	1	3	60	5	1	1	4	1	14	103	2	1	1	1	2	2	1	0	1	6	2	2	2	1	4	10000	4	10000	3	2	2	3	241085	25/01/25560	1	2	1	1	7	2	0	0	1	1	7	1	1	7	2
674	1	3	60	5	1	2	2	7	10	88	2	1	1	1	4	2	1	0	1	5	1	1	2	1	4	20000	1	9000	4	2	2	4	241085	241086	2	2	1	1	4	2	0	0	1	1	3	1	1	3	2
675	1	3	60	5	1	1	3	5	15	95	2	1	1	1	3	2	1	0	1	6	1	2	2	1	4	10000	5	6000	4	1	2	3	888.	888.	#NULL!	#NULL!	#NULL!	#NULL!	#NULL!	#NULL!	#NULL!	#NULL!	#NULL!	#NULL!	#NULL!	#NULL!	#NULL!	#NULL!	#NULL!
676	1	3	60	5	1	2	4	4	18	105	2	1	1	1	2	2	1	0	1	5	1	1	2	1	4	10000	4	6000	2	3	2	4	888.	888.	#NULL!	#NULL!	#NULL!	#NULL!	#NULL!	#NULL!	#NULL!	#NULL!	#NULL!	#NULL!	#NULL!	#NULL!	#NULL!	#NULL!	#NULL!
677	1	2	60	5	1	2	3	2	14	90	2	1	1	1	3	2	1	0	1	3	1	1	2	1	4	9000	4	9000	3	2	2	3	888.	888.	#NULL!	#NULL!	#NULL!	#NULL!	#NULL!	#NULL!	#NULL!	#NULL!	#NULL!	#NULL!	#NULL!	#NULL!	#NULL!	#NULL!	#NULL!
678	1	3	60	5	1	2	3	6	14	9	2	1	1	1	3	2	1	0	1	4	1	1	2	1	4	15000	5	10000	2	1	2	4	888.	888.	#NULL!	#NULL!	#NULL!	#NULL!	#NULL!	#NULL!	#NULL!	#NULL!	#NULL!	#NULL!	#NULL!	#NULL!	#NULL!	#NULL!	#NULL!
679	1	2	52	5	1	2	4	0	16	90	2	2	1	1	4	2	1	0	1	2	1	2	2	1	4	5000	4	888	2	1	2	4	241062	241062	1	2	1	1	4	2	0	0	2	0	0	1	1	1	2
680	1	1	47	6	1	1	4	3	13	95	1	2	1	1	4	2	1	0	1	3	0	1	2	1	3	3000	4	888	2	2	2	1	240726	241091	1	2	1	2	1	2	0	0	1	1	1	1	3	1	2
681	1	3	26	12	1	2	3	0	13	90	2	2	1	1	2	2	1	0	1	5	0	2	2	1	4	888	4	888	4	5	2	4	241091	241093	3	2	1	#NULL!	#NULL!	2	0	0	2	0	0	2	0	0	2
682	1	3	31	12	1	2	3	7	14	106	2	1	1	1	4	2	1	0	1	6	0	1	4	1	4	888	4	888	3	2	2	4	241084	241085	2	2	2	0	0	2	0	0	1	1	1	1	1	1	2
683	1	2	31	12	1	1	1	2	9	888	2	2	1	1	4	1	1	0	1	5	1	1	2	1	6	12000	6	12000	3	1	2	4	241086	241086	1	2	1	1	3	2	0	0	1	1	1	2	0	0	2
684	1	3	47	6	1	2	5	0	97	120	1	1	1	1	4	1	1	0	1	5	2	1	2	1	3	9000	1	0	2	4	2	4	241082	241085	4	2	1	1	1	2	0	0	1	1	3	1	1	4	2
685	1	3	47	6	1	1	1	4	10	79	1	1	1	1	4	1	1	0	1	6	2	1	2	1	4	9000	3	888	4	3	2	4	241083	241084	2	2	1	1	2	2	0	0	1	1	3	1	1	3	2
686	1	3	47	6	1	1	3	0	15	100	1	2	1	1	2	2	1	0	1	3	1	1	2	1	3	888	3	888	3	5	2	4	241084	241087	3	2	1	#NULL!	#NULL!	2	0	0	1	#NULL!	#NULL!	2	0	0	1
687	1	2	38	14	3	1	2	2	11	84	2	2	1	1	4	1	1	0	1	7	0	1	2	1	4	10000	1	0	2	3	2	2	241085	241086	2	2	2	0	0	2	0	0	2	0	0	1	1	3	2
688	1	2	5	1	1	2	1	0	6	74	1	2	1	1	2	1	1	0	1	4	2	1	2	1	4	20000	1	0	2	1	2	1	241097	241098	2	3	1	1	4	2	0	0	1	1	2	2	0	0	2
689	1	1	5	1	1	1	2	2	12	87	1	1	1	1	4	2	1	0	1	4	1	2	2	1	5	6000	5	6000	2	4	2	4	241096	241245	1	2	1	1	4	2	0	0	1	1	2	1	1	3	2
690	1	2	1	1	1	1	1	2	12	80	1	2	1	1	2	1	1	0	1	12	1	1	2	1	4	10000	5	5000	2	4	2	1	241091	241092	2	2	1	1	5	1	1	4	2	0	0	1	1	5	1
691	1	2	6	1	1	2	2	3	13	91	2	1	1	1	3	2	1	0	1	4	1	1	2	1	4	15000	4	15000	2	6	2	4	241092	241092	1	3	1	2	5	1	3	4	2	0	0	1	1	3	2
692	1	2	59	5	1	1	3	0	14	93	1	1	1	1	4	2	2	3	2	4	1	1	2	1	4	12000	4	12000	2	4	2	4	241097	241098	2	2	2	0	0	2	0	0	1	1	3	1	1	4	2
693	1	2	59	5	1	1	3	1	14	98	1	1	1	1	4	2	1	0	1	6	1	1	4	1	3	9000	3	9000	2	3	2	2	241098	241098	1	2	1	1	5	2	0	0	2	0	0	1	1	5	2
694	1	2	59	5	1	2	4	2	14	100	1	1	1	1	4	2	1	0	1	5	1	2	2	1	4	15000	4	15000	2	1	2	4	241097	241097	1	2	1	1	5	2	0	0	2	0	0	1	1	3	2
695	1	2	59	5	1	1	2	10	15	95	1	1	1	1	2	2	1	0	1	3	1	2	2	1	4	15000	4	15000	3	2	2	3	241097	241098	2	2	1	1	4	2	0	0	2	0	0	1	1	2	2
696	1	2	2	1	1	2	1	6	11	82	2	2	1	1	4	1	1	0	1	5	1	1	2	1	3	9000	1	0	2	1	2	1	241134	241137	1	2	1	1	4	2	0	0	2	0	0	1	1	3	2
697	1	2	2	1	1	2	1	1	7	76	2	2	1	1	4	1	1	0	1	4	1	1	2	1	4	9000	1	0	2	1	2	1	241132	241134	3	2	1	1	2	2	0	0	1	1	2	1	1	4	2
698	1	5	1	1	1	2	1	9	10	78	1	2	1	1	4	1	1	0	1	5	1	1	2	1	4	5000	1	0	2	1	2	1	241128	241130	2	2	1	1	2	2	0	0	2	0	0	1	1	1	1
699	1	2	5	1	1	1	2	8	15	101	1	1	1	1	3	2	1	0	1	3	1	1	2	1	4	10000	4	10000	3	1	2	4	241111	241112	2	2	1	1	4	2	0	0	1	1	2	1	1	3	2
700	1	2	51	1	1	1	2	6	20	108	2	1	1	1	4	2	1	0	1	5	1	1	2	1	5	8000	5	8000	2	4	2	4	241110	241111	2	2	1	1	2	1	1	1	1	1	1	1	1	3	2
701	1	2	2	1	1	1	9	0	23	125	2	1	1	1	3	3	1	0	1	7	1	1	2	1	4	15000	4	10000	2	4	2	1	241103	241108	5	2	2	0	0	2	0	0	1	1	2	1	1	3	1
702	1	2	1	1	1	2	3	0	12	79	1	2	1	1	4	1	2	1	1	6	2	1	2	1	4	7000	1	0	2	1	2	1	241147	241148	2	2	1	1	3	2	0	0	2	0	0	2	0	0	2
703	1	2	39	14	3	1	3	4	20	116	1	1	2	1	4	2	1	0	1	4	1	1	2	1	3	8000	3	8000	3	1	2	4	241139	241141	3	2	1	2	4	2	0	0	1	1	4	1	2	4	2
704	1	1	39	14	3	1	3	4	14	100	1	1	1	1	4	2	1	0	1	3	1	1	2	1	3	10000	3	10000	2	1	2	4	241141	241145	4	2	1	1	4	1	1	4	2	0	0	1	1	4	2
[truncated: 41 more columns]
